## Deletion of *Gremlin-2* alters estrous cyclicity and disrupts female fertility in mice

Robert T. Rydze<sup>1,2</sup>, Bethany Patton<sup>3,4</sup>, Hannia Salazar-Torralba<sup>3</sup>, Shawn Briley<sup>3,5</sup>, Gregory Gipson<sup>7</sup>, Rebecca James<sup>3</sup>, Aleksandar Rajkovic<sup>8</sup>, Thomas Thompson<sup>7</sup>, and Stephanie A. Pangas<sup>3,4,5,6\*</sup>

<sup>1</sup>Division of Reproductive Endocrinology & Infertility, Department of Obstetrics & Gynecology, Baylor College of Medicine and Texas Children's Hospital Pavilion for Women, Houston, TX, 77030, USA; <sup>2</sup>Graduate Program in Clinical Scientist Training, Baylor College of Medicine, Houston, TX 77030; <sup>3</sup>Department of Pathology & Immunology, Baylor College of Medicine, Houston, TX 77030; <sup>4</sup>Graduate Program in Molecular & Cellular Biology, Baylor College of Medicine, Houston, TX 77030; <sup>5</sup>Graduate Program in Biochemistry & Molecular Biology, Baylor College of Medicine, Houston, TX 77030; <sup>6</sup>Department of Molecular & Cellular Biology, Baylor College of Medicine, Houston, TX 77030; <sup>7</sup>Department of Molecular Genetics, Biochemistry, & Microbiology, University of Cincinnati College of Medicine, Cincinnati, OH 45267, USA; <sup>8</sup>Department of Pathology, University of California, San Francisco, USA, Department of OB-GYN, University of California, San Francisco, USA, Institute of Human Genetics, University of California, San Francisco, USA,

**\*Corresponding Author:** Stephanie A. Pangas, PhD, [spangas@bcm.edu](mailto:spangas@bcm.edu)

**Grant Support:** These studies were supported by NIH grants R01 HD085994 (to S.A.P.), R35 GM134923 (to TT), R01 HD070647 and R21HD074278 (to AR), P50 HD28934 (to The University of Virginia Center for Research in Reproduction Ligand Assay and Analysis Core),

P30 CA125123 (to Baylor College of Medicine Advanced Technology Cores/Dan L. Duncan Cancer Center).

**Key words:** Gremlin, ovary, folliculogenesis, infertility, reproduction

**Running Title:** Gremlin-2 in female fertility

**Word Count:** Abstract (225); Total (5509)

## 1 **Abstract**

2           Members of the differential screening-selected gene aberrative in neuroblastoma (DAN)  
3 protein family are developmentally conserved extracellular binding proteins that antagonize bone  
4 morphogenetic protein (BMP) signaling. This protein family includes the Gremlin proteins,  
5 GREM1 and GREM2, which are known to have key functions during embryogenesis and adult  
6 physiology. While BMPs play essential roles in adult female reproductive physiology, the role  
7 of the DAN family in ovarian function is less understood. We generated mice null for *Grem2* to  
8 study its role in female fertility in addition to screening patients with primary ovarian  
9 insufficiency for variants in GREM2. *Grem2*<sup>-/-</sup> mice are viable and female *Grem2*<sup>-/-</sup> mice have  
10 diminished fecundity and irregular estrous cycles. This is accompanied by reduced serum levels  
11 of anti-Müllerian hormone, a marker of the ovarian reserve, in adult mice. Alterations in ovarian  
12 expression of inhibin and activin subunit genes, which are required for regulation of the  
13 hypothalamic-pituitary-ovarian (HPO) axis, were identified. While *Grem2* mRNA transcript was  
14 not detected in the pituitary, *Grem2* was expressed in the hypothalami of wild type female mice.  
15 Additionally, screening 106 women with primary ovarian insufficiency identified one individual  
16 with a heterozygous variant in GREM2 that lies within the predicted BMP-GREM2 interface.  
17 In total, these data suggest that *Grem2* is necessary for female fecundity by playing a novel role  
18 in regulating the HPO axis and possibly contributing to female reproductive disease.

## 19 **Introduction**

20 Gremlin-2 (GREM2) is a member of the *differential screening-selected gene aberration*  
21 *in neuroblastoma* (DAN) family of bone morphogenetic protein (BMP) antagonists and is also  
22 known as *protein related to DAN and Cerberus* (PRDC) (1-3). It was originally identified in a  
23 gene trap for developmentally important genes (4). The DAN family includes GREM2/PRDC,  
24 Gremlin-1 (GREM1), Sclerostin, DAN, Cerberus, Caronte, Coco, and Dante (5). This protein  
25 family is best characterized as extracellular binding proteins that sequester BMPs, thereby  
26 preventing them from binding and activating their signaling receptor complex. GREM2 strongly  
27 inhibits BMP signaling with high affinity for BMP2, BMP4, and BMP7 (6). GREM2 also binds  
28 other TGF $\beta$  family members, including anti-Müllerian hormone (AMH) and with low affinity to  
29 GDF5 (6,7). GREM2 tightly associates with heparin through a protein binding domain outside  
30 of the BMP binding domain, which limits or downregulates BMP signaling, thus enhancing the  
31 inhibitory activity of GREM2 on BMPs (2,8).

32 Human genome-wide association studies (GWAS) identified *GREM2* variants associated  
33 with developmental disorders and disease, such as bone function and bone mass associated with  
34 osteoporosis, atrial fibrillation, and tooth agenesis (9-13). A *Grem2*<sup>-/-</sup> mouse line was previously  
35 developed as part of a high-throughput mouse knockout and phenotyping project (14). Skeletal  
36 phenotypes such as elevated spine and femur bone mineral density as well as tooth defects were  
37 identified as the major defects in *Grem2*<sup>-/-</sup> mice (14). No fertility defects were reported in male  
38 or female *Grem2*<sup>-/-</sup> mice, although the reproductive phenotyping screen was limited (P. Vogel,  
39 personnel communication). A variant of *GREMI* has been reported in a patient with primary  
40 ovarian insufficiency (POI), but none have been reported for *GREM2* (15).

41           There are limited studies characterizing GREM2 function in female reproductive biology.  
42   *GREM2* is expressed in the developing human ovary at 8-21 weeks gestation, with increasing  
43   expression towards the time of primordial follicle formation (16). Embryonic *Grem2* expression  
44   in the developing mouse gonad (male or female) has not been not characterized, but *Grem2* is  
45   expressed in the mouse and rat ovary in granulosa cells during postnatal follicle development (1).  
46   *In vitro* studies indicate GREM2 inhibits BMP4 and AMH, both of which regulate growth  
47   dynamics of the primordial to primary follicle transition, although in opposing directions (*i.e.*,  
48   BMP4 promotes while AMH inhibits the transition) (1,7,17-19), possibly indicating a role for  
49   GREM2 in regulating growth dynamics of the ovarian reserve.

50           Given above studies implicating GREM2 in ovarian folliculogenesis, we generated a new  
51   knockout mouse model of *Grem2* to determine its role in mammalian reproduction. We found  
52   that *Grem2*<sup>-/-</sup> females have altered fecundity due to changes in reproductive cyclicity and a  
53   reduction of the ovarian reserve marker, AMH, while not grossly affecting folliculogenesis. We  
54   additionally identified a heterozygous novel nonsynonymous mutation in a patient with POI.  
55   These data suggest that GREM2 may be required to regulate reproductive function in both mouse  
56   and human, possibly at multiple levels within the HPO axis.

57

## 58 **Materials and Methods**

### 59 **Generation of *Grem2*<sup>-/-</sup> mice**

60 Experimental animals were used in accordance with the National Institutes of Health  
61 Guide for the Care and Use of Laboratory Animals using Institutional Animal Care and Use  
62 Committee approved protocols at Baylor College of Medicine. Mice were maintained on a  
63 *C57BL/6/129S7;SvEvBrd* mixed hybrid background, which was the genetic background to our  
64 previous knockout of *Grem1* (20) as well as our other published lines. Mice were housed in  
65 microisolator cages with acidified water on a fixed 12-hr light and 12-hour dark cycle and fed ad  
66 libitum on a breeder rodent chow (5053 PicoLab Rodent Diet 20, Richmond, IN) supplemented  
67 twice weekly with a soft pellet dietary supplement (LoveMash Rodent Reproductive Diet, Bio-  
68 Serve, Flemington, NJ). Incisor length and weight was monitored during their housing.

69 A *Grem2* null allele was generated at the Embryonic Stem Cell and Genetically  
70 Engineered Mouse Cores at Baylor College of Medicine. Single guide RNA (sgRNA) sequences  
71 were selected to flank the genomic region surrounding exon 2 of the *Grem2* gene (upstream  
72 sgRNA 5'-GGGGTAGATGGTGCTACTTC **CGG**; downstream sgRNA, 5'-  
73 GAAAAATCTTGTCGAGTTTC **TGG**; PAM sequences are in bold) using the CRISPR Design  
74 Tool (21) and examined for potential off target mutagenesis. Neither guide was predicted to  
75 have off target effects. DNA templates for *in vitro* transcription of sgRNAs were produced using  
76 overlapping oligonucleotides (in a high-fidelity PCR reaction (22) and sgRNA was transcribed  
77 using the MEGA shortscript T7 kit (ThermoFisher, Waltham, MA). Cas9 mRNA was purchased  
78 from ThermoFisher. The BCM Genetically Engineered Mouse Core microinjected Cas9 mRNA  
79 (100 ng/μl) and sgRNA (10 ng/μl) into the cytoplasm of 100 pronuclear stage C57Bl/6J  
80 embryos. Cytoplasmic injections were performed using a microinjection needle (1 mm outer and

81 0.75 mm inner) with a tip diameter of 0.25-0.5  $\mu\text{m}$ , an Eppendorf Femto Jet 4i to set pressure and  
82 time to control injection volume (0.5-1 pl per embryo). Injections were performed under a 200-  
83 400 $\times$  magnification with Hoffman modulation contrast for visualizations.

84 A single PCR reaction using three primers (P1: 5'-  
85 TGTTGTTGTTGTTGACAAAATACTTG; P2: 5'-AATACGAGAAAGCCGTGCTG; P3: 5'-  
86 AAAGAGGTGGTGGTGTCCAG) identified the wild type allele (251 bp product) and the  
87 deletion allele (~ 510-520 bp product) in putative founders and resulting offspring. Deletion of  
88 *Grem2* in founder mice was verified by Sanger sequencing of the PCR-amplified deletion allele  
89 junction fragment. Two founder mice were initially characterized but no difference in  
90 phenotypes (presence of an incisor defect; similar numbers of pups per litter; irregular litter  
91 production) were detectable, so one founder line was chosen for more detailed study. Mice were  
92 genotyped by PCR of genomic DNA isolated from ear punches or tail snips. To minimize  
93 potential off-target mutation effects, founder mice were backcrossed to F1  
94 *C57BL/6/129S7;SvEvBrd* mice prior to establishing homozygous mating to generate *Grem2*<sup>-/-</sup>.  
95 Wild type mice of the same mixed background (*C57BL/6/129S7;SvEvBrd*) were used as controls  
96 (“wild type”).

97

## 98 **Fertility Studies**

99 Individually housed female mice of each genotype were bred at 6-8 weeks of age  
100 continuously to wild type *C57BL/6/129S7;SvEvBrd* F1 hybrid males of known fertility for eight  
101 months. The number of pups born at 4-week intervals (one ‘month’) was recorded beginning  
102 when each of the mating pairs was set up as individual pair-breeders. For estrous cycle analysis,  
103 six-month old mice were individually housed with enrichment (EnviroPak, Lab Supplies, Dallas,

104 TX) and vaginal lavage and cytology was performed daily at 9:00am for 1 month as previously  
105 described to identify four stages: estrus, diestrus, proestrus and metestrus (23).

106

### 107 **Histologic Analysis**

108 Mice were weighed prior to necropsy then anesthetized by isoflurane inhalation (Abbott  
109 Laboratories, Abbott Park, IL) and euthanized by cervical dislocation. Estrous cycle was  
110 determined at time of necropsy, if not already known. Ovaries were collected and fixed in 10%  
111 neutral buffered formalin (Electron Microscopy Sciences, Hatfield, PA) overnight, transferred to  
112 70% ethanol, and processed and embedded at the Human Tissue Acquisition and Pathology Core  
113 at Baylor College of Medicine using standard protocols. Follicle counts were performed as  
114 previously described (24). Briefly, ovaries from 3-week mice were serially sectioned at 5- $\mu$ m  
115 and all sections retained. Sections were stained in periodic acid-Schiff (PAS) (Sigma, St. Louis,  
116 MO). Only follicles containing an oocyte with a visible nucleus (primordial, primary, secondary,  
117 antral, atretic) were counted in every fifth section to avoid double counting oocytes. Final values  
118 of preantral follicles were multiplied by a correction factor of 5 based on previous published  
119 methodologies (25). Statistical differences in the total number of follicles were assessed using  
120 Student's *t*-test.

121

### 122 **Hormone Analysis**

123 For hormone analysis, blood was retrieved from deeply anesthetized (isoflurane)  
124 diestrus stage mice by cardiac puncture, and serum separated by centrifugation in microtainer  
125 collection tubes (SST BD Microtainer, Becton, Dickinson and Company, Franklin Lakes, New  
126 Jersey) and stored at -20°C until assayed. Estradiol (ELISA, CalBiotech), follicle stimulating



127 hormone (FSH)/luteinizing hormone (LH) (ELISA, EMD Millipore), AMH (ELISA, Ansh  
128 Laboratory), and testosterone (ELISA, IBL) were quantified by the University of Virginia  
129 Ligand Core Facility (Specialized Cooperative Centers Program in Reproductive Research  
130 NICHD/NIH U54-HD28934). Assay method information is available online  
131 (<https://med.virginia.edu/research-in-reproduction/ligand-assay-analysis-core/assay-methods/>).  
132 For statistical analysis, values that fell below the threshold of detection were set to the value for  
133 the lower limit of detection (26). As ELISA data are not normally distributed, data were log  
134 transformed prior to statistical analysis.

135

### 136 **Immunohistochemistry**

137 Immunohistochemistry was performed as previously described (27) using the Vectastain  
138 ABC method (Vector Laboratories, Burlingame, CA) for analysis of the macrophage marker,  
139 F4/80 (rat anti-F4/80, catalog #AB6640, Abcam, Cambridge UK, 1:100). Immunoreactivity was  
140 visualized by diaminobenzidine (DAB) (Vector Laboratories) and ovaries counterstained in  
141 hematoxylin. Fluorescent immunohistochemistry was used to visualize AMH (goat anti-AMH,  
142 1:250; catalog #6886, Santa Cruz Biotechnology, Santa Cruz, CA). Briefly, 5 µm tissue sections  
143 were subject to antigen retrieval (0.01 M citric acid and 0.1% Triton X) (Sigma, St. Louis, MO),  
144 blocked with the avidin/biotin blocking kit (Vector Laboratories), followed by incubation 3%  
145 BSA in Tris-buffered saline (TBS) for non-specific binding. The primary antibody incubated  
146 overnight at 4°C in a humidified chamber. Slides were washed in TBS-0.1%Tween (TBS-T) and  
147 incubated at room temperature with Alexa Fluor rabbit anti-goat 594 (Invitrogen; 1:250) for 1  
148 hour, washed, incubated in 4',6'-diamidino-2-phenylindole (DAPI) (1:1000) in TBS for 5  
149 minutes then mounted in Vectashield (Vector Laboratories). Fluorescent images were captured

150 using a Nikon A1R-s confocal laser scanning microscope at the BCM Integrated Microscopy  
151 Core and processed with the Nikon Perfect Focus System (Nikon Corporation, Japan).  
152 Representative follicles within ovary section from wild type and *Grem2*<sup>-/-</sup> mice (n=3 ovaries for  
153 each genotype) were analyzed using ImageJ software (ImageJ 1.52a Wayne Rasband, National  
154 Institutes of Health, USA <http://imagej.nih.gov/ij>) to measure the mean fluorescence intensity.  
155 Follicle type was based on the classification system developed by Pedersen et al (28). From  
156 these values, the statistical difference between wild type and *Grem2*<sup>-/-</sup> follicles was compared  
157 using Student's *t*-test using Graph Pad Prism 5 (GraphPad Software La Jolla, CA).

158

### 159 **Quantitative PCR**

160 Tissues were harvested from diestrous stage females unless otherwise indicated and  
161 incubated in RNAlater (Ambion, Austin, TX) overnight at 4°C then stored at -80°C until use.  
162 RNA was isolated using the RNeasy Micro kit (Qiagen, Valencia, CA) with in column DNase  
163 treatment (Qiagen) following the manufacturer's protocol. RNA concentration was quantified  
164 using a NanoDrop Spectrophotometer ND-1000 (NanoDrop Technologies, Wilmington, DE).  
165 Complementary DNA was synthesized from 200ng of total RNA with the High-Capacity RNA-  
166 to-cDNA reverse transcription kit (Life Technologies, Waltham, MA). Real-time quantitative  
167 PCR (qPCR) assays were performed on an Applied Biosystems StepOne Realtime PCR System  
168 using TaqMan Fast Master mix and predesigned primer-probe mixes for *Grem2* (FAM labeled  
169 Mm00501909\_m1) and *Gapd* (FAM labeled Mm00484668\_m1) or Fast SYBR Green Master  
170 Mix (Life Technologies, Waltham, MA) with custom primers chosen from validated qPCR  
171 primer sets at [PrimerBank](https://www.ncbi.nlm.nih.gov/PrimerBank/). Primer sequences are available upon request. Custom DNA  
172 oligonucleotide primer pairs were synthesized at Integrated DNA Technologies (IDT, Coralville,

173 Iowa). Melt curve analysis was used to validate a single amplification peak when using SYBR  
174 Green Master Mix. Relative level of transcript was calculated using the  $\Delta\Delta CT$  method (29) with  
175 the housekeeping gene *Gapd* used for normalization and data shown mean to the relative level in  
176 wild type ovaries.

177

## 178 **POI Patient Sample Analysis and Protein Modeling**

179 Whole exome sequence data (WES) were analyzed from two previously published  
180 datasets (30,31). These data included 103 patients diagnosed with primary ovarian insufficiency  
181 (POI) at the University of Pittsburgh under the approved Institutional Review Board protocols  
182 (PRO09080427). Informed consent was obtained from all individual participants. Gene variants  
183 were evaluated using the guidelines of the American College of Medical Genetics and Genomics  
184 (ACMG), which recognizes five classes of variants: benign, likely benign, uncertain  
185 significance, likely pathogenic, and pathogenic (32) and variants with minor allelic frequency in  
186 the Exome Aggregation Consortium (ExAC) database  $> 1\%$  were excluded. Variants not present  
187 in the 1000 Genomes Project, Exome Variant Server data sets, Exome Aggregation Consortium  
188 (ExAC, Cambridge, MA), or the Single Nucleotide Polymorphism database (dbSNP) were  
189 considered novel variants (33-35). Protein modeling was performed as previously described (6)  
190 using PyMol (The PyMol Molecular Graphics System, Schrödinger, LLC, New York, NY).

191

## 192 **Statistical Analyses**

193 Statistical analysis was carried out using GraphPad Prism 5 (GraphPad Software, La  
194 Jolla, CA). Two-tailed unpaired Student *t*-test using Mann-Whitney U was used for single  
195 comparisons. One-way analysis of variance followed by Fisher least significant difference test

196 was used for multiple comparisons. Data not normally distributed (e.g., hormone data and qPCR  
197 data) were log transformed prior to statistical analysis. Linear regression was used to assess  
198 correlation between FSH and estradiol levels. Sample sizes are indicated in the text and figure  
199 legends and a minimum of at least three independent experiments was carried out at all times,  
200 with  $P < 0.05$  considered statistically significant.

201 **Results**

202

203 **Generation and validation of a *Grem2*<sup>-/-</sup> mouse model.**

204 A null allele for *Grem2* was engineered using CRISPR/Cas9 genome editing (Fig. 1).  
205 Two sgRNAs were designed to target Cas9 to flanking regions of exon 2, generating an  
206 approximately one kilobase deletion that contains the splice acceptor site in exon 2, the entire  
207 coding region, and portions of the 3' UTR (Fig. 1A). Exon 1, which encodes the 5' untranslated  
208 region (UTR) and elements of the 3' UTR remain. sgRNA was injected into pro-nuclear stage  
209 embryos along with *Cas9* mRNA. Nonhomologous end joining (NHEJ)-mediated repair of the  
210 two double stranded breaks (DSBs) created by sgRNA targeted Cas9 should result in a null allele  
211 through loss of exon 2. Seventeen live-born mice were obtained from 100 injected and  
212 transferred embryos. PCR genotyping indicated that 4 pups contained a molecular weight band  
213 that approximated the predicated size of the deletion (Fig. 1B). Different deletion sizes are  
214 produced in each founder because of the imprecise nature of NHEJ and DSB repair. DNA from  
215 the four potential founders was sequenced, and two potential founder alleles aligned with the  
216 expected deletion (Fig. 1C). These mice were individually crossed to F1 mixed hybrid strain  
217 *C57BL/6/129S7/SvEvBrd*, the genetic background for our previous studies on BMP and GREM1  
218 function in the ovary (20,36). Breeding to the wild type strain ensures germline transmission of  
219 the correct allele and reduces the probability of carryover of potential off-target mutations.  
220 Homozygous mice for both founder lines were generated from heterozygous crosses and were  
221 produced at normal Mendelian ratios for both founders. Male and female homozygous mice  
222 were viable. No difference in phenotype was detected in initial studies between founder lines

223 (e.g., incisor defects and fertility testing), so the founder line that contained the larger deletion  
224 (“P2” Fig. 1B) was chosen for further characterization.

225 We confirmed loss of *Grem2* expression by measuring *Grem2* mRNA levels by  
226 quantitative PCR (qPCR) in tissues known to highly express the transcript, which includes the  
227 ovary and lung. As predicted, *Grem2* transcript levels were undetectable in either tissue in  
228 *Grem2*<sup>-/-</sup> mice relative to the respective levels in wild type mice (Fig. 1D). As a previous null  
229 allele of *Grem2* demonstrated reduced breadth and depth of upper and lower incisors in *Grem2*<sup>-/-</sup>  
230 mice over 4 months of age (14), we also measured incisor length in adult animals of our new  
231 line. Similar to the previous model, sexually mature (i.e., over 6 weeks of age) *Grem2*<sup>-/-</sup> female  
232 mice had defects in incisor length that mainly affected the upper incisors (Fig. 1E). This did not  
233 have a major effect on their body weight, as *Grem2*<sup>-/-</sup> females had similar body weights to wild  
234 type mice at 3 weeks of age, were slightly but significantly larger than wild type mice at 6 and 12  
235 weeks, but had similar body weight to wild type mice at 24 weeks of age that fell within the  
236 range considered normal for adult C57/BL6 and 129SvEv mouse lines (Fig. 2A) (37,38).

237

### 238 **Loss of *Grem2* reduced female fecundity**

239 To test the effect of *Grem2* loss on female fertility, 6-8-week old WT and *Grem2*<sup>-/-</sup>  
240 female mice were pair bred to fertile males continuously for eight months and numbers of pups  
241 per litter and litters per month were recorded. Overall, wild type females gave birth to an  
242 average of 9.2 +/- 0.3 pups per litter and 1.1 +/- 0.02 litters per month (Fig. 2B, C). *Grem2*<sup>-/-</sup>  
243 females gave birth to similar numbers of pups per litter (8.9 +/- 0.5). However, if age is  
244 considered, a small but statistically significant, decline of 22% in pups per litter was detected in  
245 older *Grem2*<sup>-/-</sup> females when the breeding data were split into two age groups (younger and

246 older) ( $P=0.03$ ) (Fig. 2B). In addition, there was a significant decrease in the numbers of litters  
247 per month in *Grem2*<sup>-/-</sup> females (0.67 +/- 0.05) compared to wild type females (1.02 +/- 0.02)  
248 ( $P=0.001$ ) (Fig. 2C). Cycle irregularity in *Grem2*<sup>-/-</sup> occurred regardless of age; on average,  
249 during months 1-4, *Grem2*<sup>-/-</sup> female mice missed an average of 1.2 +/- 0.2 litters (compared to 0  
250 for the wild type), and during months 5-8, *Grem2*<sup>-/-</sup> female mice missed 1.8 +/- 0.2 litters  
251 (compared to 0 for the wild type). Thus, loss of *Grem2* caused an overall reduction in fecundity  
252 that appears to be primarily driven by a reduction in litter production.

253

#### 254 ***Grem2*<sup>-/-</sup> females have abnormal estrous cycles**

255 To determine if there were defects in ovarian function, we first analyzed the ovarian  
256 histology of wild type and *Grem2*<sup>-/-</sup> females at multiple time points, including immature (3-weeks  
257 of age) and sexually mature (6-weeks, 12-weeks, and 6-months of age). In sexually immature 3-  
258 week old mice, there were no significant differences in the total number of ovarian follicles at  
259 the primordial, primary, secondary, or antral stage comparing wild type to *Grem2*<sup>-/-</sup> ovaries (Fig.  
260 3A) and ovaries were of similar size with no obvious histologic defects (Fig. 3C-D). However,  
261 there was a statistically significant reduction ( $P<0.01$ ) in the number of atretic follicles in *Grem2*<sup>-/-</sup>  
262 compared to wild type (Fig. 3B). At 6 or 12 weeks of age, there were no gross histologic  
263 differences in ovaries from adult *Grem2*<sup>-/-</sup> females compared to wild type mice all stages of  
264 follicles including corpora lutea (CL) were present in both genotypes (data not shown).

265 At 6-months of age, both wild type and *Grem2*<sup>-/-</sup> ovaries contained follicles of each size  
266 class (primordial, primary, secondary, antral) as well as CL (Fig. 4A, B). However, 75% of  
267 *Grem2*<sup>-/-</sup> (n=4) contained unusually large patches of PAS positive regions of multinucleated  
268 cells, while wild type ovaries (n=4) showed only minimal patches (Fig. 4C, D). These large

269 patches of PAS<sup>+</sup> cells have been previously described as multinucleated macrophage giant cells  
270 that are typically present in ovaries from aged mice but mostly absent from mice less than 7  
271 months of age (39). By immunohistochemistry, these cells were positive for the mouse  
272 macrophage marker F4/80 (Fig. 4E, F). Previous studies have also shown that in aged (*i.e.*, +21  
273 weeks) mouse ovaries, the presence of macrophage giant cells is associated with increased  
274 fibrosis and inflammation (39). To identify if *Grem2*<sup>-/-</sup> ovaries showed increased fibrosis, 6-  
275 month old ovary sections were stained with picrosirius red (PSR), which has previously been  
276 validated as an indicator of fibrous collagen in the ovary (39). A similar level of PSR staining  
277 was observed between wild type and *Grem2*<sup>-/-</sup> ovaries (data not shown), indicating similar levels  
278 of fibrous collagen in the ovaries, and thus macrophage infiltration does not appear to be directly  
279 linked to fibrosis, unlike in aged mice (39). As a prior study of the role of *Grem2*<sup>-/-</sup> in the heart  
280 after myocardial infarction (MI) (40), identified increases in inflammatory markers, which  
281 included *Bmp2*, tumor necrosis factor alpha (*Tnf*) and e-selectin (*Sele*), we therefore analyzed  
282 potential upregulation of these genes in 6-month old ovaries from WT and *Grem2*<sup>-/-</sup> by qPCR;  
283 however, we did not see any difference in expression levels (Table 1).

284 Because of the significant changes to litter production, (Fig. 2C), estrous cycles were  
285 evaluated in six-month-old females. Six-month old wild type mice had normal estrous cycles  
286 that averaged 4-5 days while *Grem2*<sup>-/-</sup> female mice had irregular estrous cycles (Fig. 5A).  
287 *Grem2*<sup>-/-</sup> females had a significant increase in the percentage of days spent in metestrus and  
288 diestrus and a concomitant decrease in the number of estrous cycles per month (Fig. 5B, C).  
289 Serum hormone profiles of diestrus stage 6-month old females showed no change in mean  
290 levels of estradiol, testosterone, luteinizing hormone, or follicle stimulating hormone (FSH)  
291 between wild type and *Grem2*<sup>-/-</sup> (Table 2). We additionally used linear regression to test the



292 correlation between estradiol and FSH levels. While diestrous stage wild type mice exhibit a  
293 correlation between estradiol and FSH ( $r^2=0.48$ ), this correlation is not found in diestrous stage  
294 *Grem2*<sup>-/-</sup> females ( $r^2=0.07$ ) (Fig. 6A).

295 Alterations in the estrous cycle could be due to dysfunction of the HPO axis, but there is  
296 limited information for a role for *Grem2*, even though BMP4 is known to be important in mouse  
297 pituitary development (41) and may regulate FSH in gonadotropes (42,43). *Grem2* is expressed  
298 in the brain (1), but hypothalamic expression has not been previously reported (44). By qPCR,  
299 *Grem2* could not be detected in the adult mouse pituitary; however, expression was present in the  
300 hypothalamus at ~60% relative to the ovary (Fig. 6B). As the production of the peptide  
301 hormone, inhibin, from the ovary is also responsible for HPO negative feedback and suppression  
302 of FSH, ovarian expression of genes encoding the inhibin/activin subunits were measured. By  
303 qPCR, transcript levels of *Inha*, *Inhba*, and *Inhbb* significantly increased ( $P<0.05$ ) in *Grem2*<sup>-/-</sup>  
304 ovaries compared to wild type (Fig. 6C). Markers of key cell types in the ovary showed no  
305 difference between genotypes, including genes expressed in oocytes (*Bmp15*, *Gdf9*), granulosa  
306 cells (*Bmp2*, *Cype19a1*, *Fshr*, *Kitl1/2*) or thecal cells (*Bmp4*) (Table 1), supporting the histologic  
307 findings of similar follicle stages at this age. Because of its role as a marker of the ovarian  
308 reserve (45-47), serum levels of AMH were measured in wild type and *Grem2*<sup>-/-</sup> mice.  
309 Compared to wild type, *Grem2*<sup>-/-</sup> showed significantly reduced levels of AMH at 6 months of age  
310 ( $P<0.01$ ) (Table 2). As AMH is secreted from granulosa cells of growing follicles, AMH  
311 immunoreactivity in individual follicles was quantified by immunofluorescence (Fig. 7). When  
312 plotted by mean fluorescent intensity versus follicle stage, there was significantly reduced AMH  
313 immunoreactivity in *Grem2*<sup>-/-</sup> preantral follicles mice compared to the follicles of wild type mice

314 (Fig. 7), indicating that it is not loss of follicles that reduces serum AMH, but instead, the  
315 reduction is due to decreased expression in granulosa cells.

316

### 317 ***GREM2* has a rare variant in patient samples of POI**

318 A previously published cohort of POI patient samples that had undergone whole exome  
319 sequencing (WES) was queried for nonsynonymous and splice site variants in *GREM2* (30). Of  
320 the 103 POI cases sequenced, one individual contained a single novel nonsynonymous  
321 heterozygous variant in *GREM2*, c.C356T:p.S119F in exon 2. This variant was not present in  
322 The Genome Aggregation Database (gnomAD) or other databases. We further modeled the  
323 location of this variant based on the previously published crystal structure of *GREM2* with  
324 GDF5 (6). The S119F variant lies in the interface of the interaction domain between antagonist  
325 and ligand (Fig. 8), which has previously been shown to be key region required for robust BMP  
326 antagonism (6).

327

328 **Discussion**

329           Because of their roles as powerful developmental morphogens and regulators of adult  
330 tissue homeostasis, BMP activity is under strict biologic control. One mechanism for their  
331 regulation is through production of extracellular binding proteins, including GREM2, which  
332 when bound to BMPs, disrupts the ability of the ligand to form the ternary signaling receptor  
333 complex. GREM2 exists as a stable non-disulfide bonded dimer with binding affinities for  
334 BMP2 and BMP4 in the nanomolar range (1,2,6,48). Additionally, GREM2 binds and inhibits  
335 AMH, another member of the TGF $\beta$  family, in *in vitro* assays (7). *GREM2* is expressed in the  
336 fetal human ovary as well as in granulosa cells of mouse ovarian follicles (1,16) although its role  
337 in either the embryonic or adult ovary is not well understood. A previous mouse knockout of  
338 *Grem2* was published as part of a high-throughput knockout phenotyping program by Lexicon  
339 Pharmaceuticals that included fertility assays. These assays typically were performed from ages  
340 8-16 weeks using two homozygous knockout females mated to a wild type male (49). The major  
341 defect identified in Lexicon's *Grem2*<sup>-/-</sup> line related to small and malformed upper and lower  
342 mandibular incisors (14). No fertility defects were noted, though it is unlikely that the fertility  
343 screen had sufficient depth to identify changes in fecundity beyond overt sterility, particularly for  
344 those that arise due to aging. As that model was unavailable, we developed a new *Grem2*<sup>-/-</sup>  
345 mouse model using CRISPR/Cas9 gene targeting to delete 1kb containing the entire coding exon  
346 (exon 2). This new mouse model phenocopies the Lexicon deletion with respect to dental  
347 defects, even though the genetic background is dissimilar [inbred C57/B16 (albino) versus mixed  
348 hybrid in our study], suggesting a robust phenotype resulting from loss of *Grem2* in tooth  
349 development.

350 Unlike homozygous mutations in *Grem1*, which are perinatal lethal (27,50), *Grem2*<sup>-/-</sup>  
351 mice are viable but subfertile. Overall litter production in *Grem2*<sup>-/-</sup> females was reduced  
352 throughout the reproductive lifespan, but appears to worsen in older mice (i.e., 6-8 months of  
353 age). This change in litter production primarily results from irregular estrous cycles. As *Grem2*  
354 is widely expressed and transcripts have been identified in the mouse ovary, brain, and uterus  
355 amongst other organs (1), it is currently unclear if the changes in cyclicity are due intraovarian  
356 defects, defects in other tissues, or a combination of both. Within the mouse ovary, *Grem2* is  
357 expressed from granulosa cells and is upregulated in response to gonadotropin stimulation  
358 (1,27,51). While *Grem2* expression could not be detected in the mouse pituitary by qPCR,  
359 mRNA transcripts were detected in the hypothalamus at about half the level in the ovary. The  
360 relative contribution of intraovarian defects versus potential hypothalamic defects remains to be  
361 determined and would require generation of a conditional allele for *Grem2* for cell-specific  
362 deletion. Interestingly, the AMH receptor (*Amhr*) has been detected in a subset of gonadotropin  
363 releasing hormone (GnRH) neurons within the hypothalamus and at least one study has shown  
364 that AMH potently activates GnRH neuron firing and GnRH-dependent LH pulsatility and  
365 secretion (52). If GREM2 regulates AMH activity as has been suggested (7), then it is possible  
366 that GnRH neuronal activity may be disrupted in *Grem2*<sup>-/-</sup> females and contribute to the fertility  
367 defect. Such studies require more precise measurements of LH pulse generation, rather than the  
368 steady state (diestrus) levels reported here.

369 Previous studies suggest GREM2 has a role in embryonic human ovary development, as  
370 its expression increases between 8-11 weeks and 14-16 weeks gestation, which corresponds to  
371 the timing of post-migratory germ cell proliferation and entry into meiosis I, respectively (16).  
372 This study also demonstrates that GREM2 partially antagonizes BMP4 induced gene expression

373 (16). Furthermore, treatment of organ cultures of rat ovaries with GREM2 reverses the ability of  
374 AMH to suppress primordial follicle activation (7). Surprisingly, ovaries from sexually  
375 immature (3-week old) *Grem2*<sup>-/-</sup> mice contain equivalent numbers of primordial follicles as the  
376 wild type mice, suggesting that *Grem2* may not play a major role in embryonic or postnatal  
377 formation of the ovarian reserve in mice, or that developmental changes in the ovarian reserve  
378 are resolved to wild type levels during the first wave of folliculogenesis. This is different than  
379 what has been noted for mice homozygous null for *Grem1*, which have decreased numbers of  
380 germ cells and primordial follicles at birth (27). Alternatively, loss of *Grem2* in the embryo or  
381 postnatally could be compensated for by another BMP antagonist, such as *Grem1*. Functional  
382 redundancy between *Grem2* and *Grem1* has been hypothesized (7,27), but not demonstrated.

383 Ovaries from adult *Grem2*<sup>-/-</sup> contained all stages of follicle growth, including primordial  
384 follicles, and produced normal-sized litters earlier in their reproductive lifespan but show a small  
385 but significant decrease in litter sizes (~24%) at later ages (>6 months of age). This suggests  
386 some intraovarian defect in older mice. While the mean diestrous stage serum levels of estradiol  
387 and FSH were similar between wild type and *Grem2*<sup>-/-</sup> mice, the well-known correlation between  
388 estradiol and FSH was altered in *Grem2*<sup>-/-</sup> females. In wild type rodents, at metestrus and  
389 diestrus, low but rising levels of estradiol from granulosa cells of growing follicles negatively  
390 regulate production of FSH by suppressing hypothalamic secretion of gonadotropin hormone  
391 releasing hormone (53-55). Furthermore, circulating levels of inhibin suppress FSH production  
392 from the pituitary (55-57). In *Grem2*<sup>-/-</sup> ovaries, the inhibin/activin subunit genes (*Inha*, *Inhba*,  
393 *Inhbb*) were upregulated in adult animals, which may further contribute to changes to  
394 reproductive cyclicality if circulating levels of inhibin A and inhibin B, which are known to vary  
395 with the estrous cycle stage in rodents (57), are also altered. A more detailed analysis of FSH

396 and LH production and secretion as well as an analysis of circulating inhibin levels during the  
397 different stages of the estrous cycle will help to resolve these issues. In addition, in *Grem2*<sup>-/-</sup>  
398 ovaries, there were loss of granulosa cell production of AMH, which is most highly expressed in  
399 growing preantral follicles (58,59). Suppression of *Amh* expression in *Grem2*<sup>-/-</sup> ovaries could be  
400 directly or indirectly related to changes in BMP signaling, as regulation of *Amh* by various  
401 growth factor pathways during preantral folliculogenesis is not fully understood (60). *Amh* is  
402 known to be downregulated in rodents and human when follicles reach the antral stage (61), so  
403 potentially, the *Grem2*<sup>-/-</sup> model will allow us to elucidating key pathways controlling AMH  
404 production.

405         While litter production was reduced in *Grem2*<sup>-/-</sup> females after 10-12 weeks of age  
406 compared to wild type mice, it was more pronounced after six months of age. However, unlike  
407 wild type mice, 6-month old *Grem2*<sup>-/-</sup> ovaries accumulate large patches of F4/80+ multinucleated  
408 macrophage giant cells, which were not present at three-month of age (data not shown). The  
409 significance of macrophage giant cells is unknown, but ovaries from aged wild type female mice  
410 (14-17 months of age) accumulate areas of fibrotic tissue concurrent with chronic inflammation  
411 and macrophage giant cells and these were generally absent in ovaries from mice less than 7  
412 months of age (CD1 and CB6F1 strains) (62). Thus *Grem2*<sup>-/-</sup> ovaries have one hallmark of early  
413 aging, but without significant changes in fibrosis. The presence of large patches of F4/80+  
414 macrophages also suggests an increase in tissue inflammation, similar to a previous study of  
415 *Grem2*<sup>-/-</sup> within the heart the context of recovery from MI. Following MI, *Grem2*<sup>-/-</sup> mice show  
416 excessive inflammation, including increases in F4/80+ macrophages and poorer functional  
417 outcomes as result of overactive BMP signaling, which can be rescued by intraperitoneal  
418 administration of recombinant GREM2 (40). Furthermore, a BMP pro-inflammatory cascade

419 has been suggested in other diseases, including chronic inflammatory arthritis and  
420 atherosclerosis, though in other diseases BMP signaling is anti-inflammatory (63,64). How loss  
421 of *Grem2* affects the balance of TGF $\beta$  superfamily signaling, including AMH and BMPs, within  
422 the ovary remains to be determined. As AMH has reduced expression in follicles of *Grem2*<sup>-/-</sup>  
423 ovaries, inter-and intra-follicle BMP signaling may predominate over AMH, promoting  
424 macrophage recruitment or differentiation, disrupting ovarian function, and possibly altering  
425 feedback within the HPO axis.

426         A number of recent studies implicate changes to BMP signaling with the development of  
427 POI in women. This includes genetic variants in BMP ligands (*BMP15*) (65,66), the *BMP15*  
428 promoter (67), the BMP receptors (*BMPRIA* and *BMPR1B*) (68), and the BMP antagonist,  
429 *GREM1* (15). It is currently unknown how these variants contribute to POI in women. Because  
430 these genes are also expressed in the brain and pituitary in various species (42,69-72), alterations  
431 in their activity in the etiology of POI could occur at multiple levels of the HPO axis. Studies on  
432 the structure of *GREM2* with *GDF5* indicates that *GREM2* forms alternating higher form stable  
433 aggregates with its ligands that is unique among the BMP antagonists, as compared to *Noggin*  
434 and *Follistatin* (6). The location of the S119F mutation lies within the interface between  
435 *GREM2* and *GDF5*, but it is currently not known how this mutation affects functional  
436 antagonism. Mechanistically, *GREM2* wraps around the BMP signaling molecule, occluding  
437 both the type I (located at the concave dimer interface) and type II (at the convex surface of the  
438 ligand) binding sites needed for signaling (6). The side chain of the S119 residue points directly  
439 into one of the primary binding interfaces of *GDF5*, specifically the one that impairs binding of  
440 *GDF5* to the type II BMP receptors. Previous mutational work has demonstrated that this section  
441 of *GREM2* is particularly important to robust BMP inhibition and sensitive to mutational

442 disruption (6). Additionally, when we modeled S119 with a phenylalanine, a significant steric  
443 clash occurred with both the ligand and residues of GREM2 important for GDF5 binding. Thus,  
444 we anticipate the S119F mutation would interfere ligand binding and weaken GREM2  
445 antagonism, potentially leading to a gain-of-function in BMP or AMH signaling. The genetic  
446 variants found for *BMPRIA* (*ALK3*) and *BMPR1B* (*ALK6*) are located within the kinase domain  
447 of the receptors, and show altered signaling when measured by *in vitro* assays. The BMPR1A  
448 p.Arg442His variant inhibits receptor activation and was discovered in a patient with menarche  
449 at 14 years and amenorrhea 1 year later (73). The BMPR1B p.Phe272Leu variant shows  
450 constitutive activation when tested *in vitro*, and was discovered in a patient with secondary  
451 amenorrhea at age 27 (73). Thus, both loss-of-function and gain-of-function mutations that alter  
452 BMP signaling may drive POI. Of interest, mouse knockouts do not always fully phenocopy  
453 human disease; for instance, women with loss-of-function variants in *DCAF17* show  
454 hypogonadism, but when the same mutations are made in mouse models, the mice are subfertile  
455 (74). Additional structure-function studies will be required to understand how the *GREM2*  
456 variant alters BMP or AMH signaling and its consequences on HPO function.

457

## 458 **Acknowledgements**

459 Core services at Baylor College of Medicine are supported by funding from the NIH (P30  
460 CA125123) and the authors additionally thank members of the core facilities at BCM for their  
461 assistance with these studies: Genetically Engineered Mouse Core, the Human Tissue  
462 Acquisition and Pathology Core, Embryonic Stem Cell Core and Dr. Jason Heaney), the Vital  
463 Microscopy and *in vivo* Imaging Core, and the Integrated Microscopy Core. The authors  
464 additionally acknowledge the University of Virginia Center for Reproductive Research Ligand



465 Assay and Analysis Core (supported by NIH R24 HD102061) for hormone analysis. We thank  
466 Ramya Masand, MD (Baylor College of Medicine) for histologic assessment of ovaries and  
467 Shailaja K. Mani, PhD (Baylor College of Medicine) for assistance with dissection of mouse  
468 hypothalami.

469 **References**

470

- 471 1. Sudo S, Avsian-Kretchmer O, Wang LS, Hsueh AJ. Protein related to DAN and cerberus is a  
472 bone morphogenetic protein antagonist that participates in ovarian paracrine regulation. *J Biol*  
473 *Chem.* 2004;279(22):23134-23141.
- 474 2. Nolan K, Kattamuri C, Luedeke DM, Deng X, Jagpal A, Zhang F, Linhardt RJ, Kenny  
475 AP, Zorn AM, Thompson TB. Structure of protein related to Dan and Cerberus: insights  
476 into the mechanism of bone morphogenetic protein antagonism. *Structure.*  
477 2013;21(8):1417-1429.
- 478 3. Kattamuri C, Luedeke DM, Thompson TB. Expression and purification of recombinant  
479 protein related to DAN and cerberus (PRDC). *Protein Expr Purif.* 2012;82(2):389-395.
- 480 4. Minabe-Saegusa C, Saegusa H, Tsukahara M, Noguchi S. Sequence and expression of a  
481 novel mouse gene PRDC (protein related to DAN and cerberus) identified by a gene trap  
482 approach. *Dev Growth Differ.* 1998;40(3):343-353.
- 483 5. Gazzero E, Canalis E. Bone morphogenetic proteins and their antagonists. *Rev Endocr*  
484 *Metab Disord.* 2006;7(1-2):51-65.
- 485 6. Nolan K, Kattamuri C, Rankin SA, Read RJ, Zorn AM, Thompson TB. Structure of  
486 Gremlin-2 in Complex with GDF5 Gives Insight into DAN-Family-Mediated BMP  
487 Antagonism. *Cell Rep.* 2016;16(8):2077-2086.
- 488 7. Nilsson EE, Larsen G, Skinner MK. Roles of Gremlin 1 and Gremlin 2 in regulating  
489 ovarian primordial to primary follicle transition. *Reproduction.* 2014;147(6):865-874.
- 490 8. Kattamuri C, Nolan K, Thompson TB. Analysis and identification of the Grem2  
491 heparin/heparan sulfate-binding motif. *Biochem J.* 2017;474(7):1093-1107.

- 492 9. Lu L, Huang J, Xu F, Xiao Z, Wang J, Zhang B, David NV, Arends D, Gu W, Ackert-  
493 Bicknell CL, Sabik OL, Farber CR, Quarles LD, Williams RW. Genetic dissection of  
494 femoral and tibial microarchitecture. *JBMR Plus*. 2019;3(12):e10241.
- 495 10. Kaminski A, Bogacz A, Uzar I, Czerny B. Association between GREM2 gene  
496 polymorphism with osteoporosis and osteopenia in postmenopausal women. *Eur J Obstet*  
497 *Gynecol Reprod Biol*. 2018;228:238-242.
- 498 11. Muller, II, Melville DB, Tanwar V, Rybski WM, Mukherjee A, Shoemaker MB, Wang  
499 WD, Schoenhard JA, Roden DM, Darbar D, Knapik EW, Hatzopoulos AK. Functional  
500 modeling in zebrafish demonstrates that the atrial-fibrillation-associated gene GREM2  
501 regulates cardiac laterality, cardiomyocyte differentiation and atrial rhythm. *Dis Model*  
502 *Mech*. 2013;6(2):332-341.
- 503 12. Mostowska A, Biedziak B, Zadurska M, Bogdanowicz A, Olszewska A, Cieslinska K,  
504 Firlej E, Jagodzinski PP. GREM2 nucleotide variants and the risk of tooth agenesis. *Oral*  
505 *Dis*. 2018;24(4):591-599.
- 506 13. Cheung CL, Lau KS, Sham PC, Tan KC, Kung AW. Genetic variants in GREM2 are  
507 associated with bone mineral density in a southern Chinese population. *J Clin Endocrinol*  
508 *Metab*. 2013;98(9):E1557-1561.
- 509 14. Vogel P, Liu J, Platt KA, Read RW, Thiel M, Vance RB, Brommage R. Malformation of  
510 Incisor Teeth in *Grem2*<sup>-/-</sup> Mice. *Vet Pathol*. 2014.
- 511 15. Patino LC, Beau I, Carlosama C, Buitrago JC, Gonzalez R, Suarez CF, Patarroyo MA,  
512 Delemer B, Young J, Binart N, Laissue P. New mutations in non-syndromic primary  
513 ovarian insufficiency patients identified via whole-exome sequencing. *Hum Reprod*.  
514 2017:1-9.

- 515 16. Bayne RA, Donnachie DJ, Kinnell HL, Childs AJ, Anderson RA. BMP signalling in  
516 human fetal ovary somatic cells is modulated in a gene-specific fashion by GREM1 and  
517 GREM2. *Mol Hum Reprod.* 2016;22(9):622-633.
- 518 17. Nilsson EE, Skinner MK. Bone morphogenetic protein-4 acts as an ovarian follicle  
519 survival factor and promotes primordial follicle development. *Biol Reprod.*  
520 2003;69(4):1265-1272.
- 521 18. Durlinger AL, Gruijters MJ, Kramer P, Karels B, Ingraham HA, Nachtigal MW,  
522 Uilenbroek JT, Grootegoed JA, Themmen AP. Anti-Mullerian hormone inhibits initiation  
523 of primordial follicle growth in the mouse ovary. *Endocrinology.* 2002;143(3):1076-  
524 1084.
- 525 19. Durlinger AL, Kramer P, Karels B, de Jong FH, Uilenbroek JT, Grootegoed JA,  
526 Themmen AP. Control of primordial follicle recruitment by anti-Mullerian hormone in  
527 the mouse ovary. *Endocrinology.* 1999;140(12):5789-5796.
- 528 20. Myers M, Mansouri-Attia N, James R, Peng J, Pangas SA. GDF9 modulates the  
529 reproductive and tumor phenotype of female inha-null mice. *Biol Reprod.* 2013;88(4):86.
- 530 21. Ran FA, Hsu PD, Wright J, Agarwala V, Scott DA, Zhang F. Genome engineering using  
531 the CRISPR-Cas9 system. *Nat Protoc.* 2013;8(11):2281-2308.
- 532 22. Bassett AR, Tibbit C, Ponting CP, Liu JL. Highly efficient targeted mutagenesis of  
533 *Drosophila* with the CRISPR/Cas9 system. *Cell Rep.* 2013;4(1):220-228.
- 534 23. Byers SL, Wiles MV, Dunn SL, Taft RA. Mouse estrous cycle identification tool and  
535 images. *PLoS One.* 2012;7(4):e35538.

- 536 24. Pangas SA, Jorgez CJ, Tran M, Agno J, Li X, Brown CW, Kumar TR, Matzuk MM.  
537 Intraovarian activins are required for female fertility. *Mol Endocrinol*. 2007;21(10):2458-  
538 2471.
- 539 25. Tilly JL. Ovarian follicle counts--not as simple as 1, 2, 3. *Reprod Biol Endocrinol*.  
540 2003;1:11.
- 541 26. Whitcomb BW, Schisterman EF. Assays with lower detection limits: implications for  
542 epidemiological investigations. *Paediatr Perinat Epidemiol*. 2008;22(6):597-602.
- 543 27. Myers M, Tripurani SK, Middlebrook B, Economides AN, Canalis E, Pangas SA. Loss of  
544 gremlin delays primordial follicle assembly but does not affect female fertility in mice.  
545 *Biol Reprod*. 2011;85(6):1175-1182.
- 546 28. Pedersen T, Peters H. Proposal for a classification of oocytes and follicles in the mouse  
547 ovary. *J Reprod Fertil*. 1968;17:555-557.
- 548 29. Livak KJ, Schmittgen TD. Analysis of relative gene expression data using real-time  
549 quantitative PCR and the 2(-Delta Delta C(T)) Method. *Methods*. 2001;25(4):402-408.
- 550 30. Yang X, Touraine P, Desai S, Humphreys G, Jiang H, Yatsenko A, Rajkovic A. Gene  
551 variants identified by whole-exome sequencing in 33 French women with premature  
552 ovarian insufficiency. *J Assist Reprod Genet*. 2019;36(1):39-45.
- 553 31. Desai S, Wood-Trageser M, Matic J, Chipkin J, Jiang H, Bachelot A, Dulon J, Sala C,  
554 Barbieri C, Cocca M, Toniolo D, Touraine P, Witchel S, Rajkovic A. MCM8 and MCM9  
555 Nucleotide Variants in Women With Primary Ovarian Insufficiency. *J Clin Endocrinol*  
556 *Metab*. 2017;102(2):576-582.
- 557 32. Richards S, Aziz N, Bale S, Bick D, Das S, Gastier-Foster J, Grody WW, Hegde M, Lyon  
558 E, Spector E, Voelkerding K, Rehm HL, Committee ALQA. Standards and guidelines for

- 559 the interpretation of sequence variants: a joint consensus recommendation of the  
560 American College of Medical Genetics and Genomics and the Association for Molecular  
561 Pathology. *Genet Med.* 2015;17(5):405-424.
- 562 33. Genomes Project C, Auton A, Brooks LD, Durbin RM, Garrison EP, Kang HM, Korbel  
563 JO, Marchini JL, McCarthy S, McVean GA, Abecasis GR. A global reference for human  
564 genetic variation. *Nature.* 2015;526(7571):68-74.
- 565 34. Lek M, Karczewski KJ, Minikel EV, Samocha KE, Banks E, Fennell T, O'Donnell-Luria  
566 AH, Ware JS, Hill AJ, Cummings BB, Tukiainen T, Birnbaum DP, Kosmicki JA, Duncan  
567 LE, Estrada K, Zhao F, Zou J, Pierce-Hoffman E, Berghout J, Cooper DN, Deflaux N,  
568 DePristo M, Do R, Flannick J, Fromer M, Gauthier L, Goldstein J, Gupta N, Howrigan  
569 D, Kiezun A, Kurki MI, Moonshine AL, Natarajan P, Orozco L, Peloso GM, Poplin R,  
570 Rivas MA, Ruano-Rubio V, Rose SA, Ruderfer DM, Shakir K, Stenson PD, Stevens C,  
571 Thomas BP, Tiao G, Tusie-Luna MT, Weisburd B, Won HH, Yu D, Altshuler DM,  
572 Ardissino D, Boehnke M, Danesh J, Donnelly S, Elosua R, Florez JC, Gabriel SB, Getz  
573 G, Glatt SJ, Hultman CM, Kathiresan S, Laakso M, McCarroll S, McCarthy MI,  
574 McGovern D, McPherson R, Neale BM, Palotie A, Purcell SM, Saleheen D, Scharf JM,  
575 Sklar P, Sullivan PF, Tuomilehto J, Tsuang MT, Watkins HC, Wilson JG, Daly MJ,  
576 MacArthur DG, Exome Aggregation C. Analysis of protein-coding genetic variation in  
577 60,706 humans. *Nature.* 2016;536(7616):285-291.
- 578 35. Sherry ST, Ward MH, Kholodov M, Baker J, Phan L, Smigielski EM, Sirotkin K.  
579 dbSNP: the NCBI database of genetic variation. *Nucleic Acids Res.* 2001;29(1):308-311.
- 580 36. Pangas SA, Li X, Umans L, Zwijsen A, Huylebroeck D, Gutierrez C, Wang D, Martin JF,  
581 Jamin SP, Behringer RR, Robertson EJ, Matzuk MM. Conditional deletion of Smad1 and

- 582 Smad5 in somatic cells of male and female gonads leads to metastatic tumor development  
583 in mice. *Mol Cell Biol.* 2008;28(1):248-257.
- 584 37. Reed DR, Bachmanov AA, Tordoff MG. Forty mouse strain survey of body composition.  
585 *Physiol Behav.* 2007;91(5):593-600.
- 586 38. Laboratory TJ. Body weight information for aged C57/BL/6J 2020.
- 587 39. RT R, SM B, H T-S, Pangas S. Gremlin-2 is required for female fertility. *submitted.*
- 588 40. Sanders LN, Schoenhard JA, Saleh MA, Mukherjee A, Ryzhov S, McMaster WG, Jr.,  
589 Nolan K, Gumina RJ, Thompson TB, Magnuson MA, Harrison DG, Hatzopoulos AK.  
590 BMP Antagonist Gremlin 2 Limits Inflammation After Myocardial Infarction. *Circ Res.*  
591 2016;119(3):434-449.
- 592 41. Takuma N, Sheng HZ, Furuta Y, Ward JM, Sharma K, Hogan BL, Pfaff SL, Westphal H,  
593 Kimura S, Mahon KA. Formation of Rathke's pouch requires dual induction from the  
594 diencephalon. *Development.* 1998;125(23):4835-4840.
- 595 42. Otsuka F, Shimasaki S. A novel function of bone morphogenetic protein-15 in the  
596 pituitary: selective synthesis and secretion of FSH by gonadotropes. *Endocrinology.*  
597 2002;143(12):4938-4941.
- 598 43. Huang HJ, Wu JC, Su P, Zhirnov O, Miller WL. A novel role for bone morphogenetic  
599 proteins in the synthesis of follicle-stimulating hormone. *Endocrinology.*  
600 2001;142(6):2275-2283.
- 601 44. Fredolini C, Bystrom S, Pin E, Edfors F, Tamburro D, Iglesias MJ, Haggmark A, Hong  
602 MG, Uhlen M, Nilsson P, Schwenk JM. Immunocapture strategies in translational  
603 proteomics. *Expert Rev Proteomics.* 2016;13(1):83-98.

- 604 45. Anderson RA, Nelson SM, Wallace WH. Measuring anti-Mullerian hormone for the  
605 assessment of ovarian reserve: when and for whom is it indicated? *Maturitas*.  
606 2012;71(1):28-33.
- 607 46. Broer SL, Broekmans FJ, Laven JS, Fauser BC. Anti-Mullerian hormone: ovarian reserve  
608 testing and its potential clinical implications. *Hum Reprod Update*. 2014;20(5):688-701.
- 609 47. Visser JA, Schipper I, Laven JS, Themmen AP. Anti-Mullerian hormone: an ovarian  
610 reserve marker in primary ovarian insufficiency. *Nat Rev Endocrinol*. 2012;8(6):331-341.
- 611 48. Nolan K, Kattamuri C, Luedeke DM, Angerman EB, Rankin SA, Stevens ML, Zorn AM,  
612 Thompson TB. Structure of neuroblastoma suppressor of tumorigenicity 1 (NBL1):  
613 insights for the functional variability across bone morphogenetic protein (BMP)  
614 antagonists. *J Biol Chem*. 2015;290(8):4759-4771.
- 615 49. Brommage R, Liu J, Hansen GM, Kirkpatrick LL, Potter DG, Sands AT, Zambrowicz B,  
616 Powell DR, Vogel P. High-throughput screening of mouse gene knockouts identifies  
617 established and novel skeletal phenotypes. *Bone Res*. 2014;2:14034.
- 618 50. Khokha MK, Hsu D, Brunet LJ, Dionne MS, Harland RM. Gremlin is the BMP  
619 antagonist required for maintenance of Shh and Fgf signals during limb patterning. *Nat*  
620 *Genet*. 2003;34(3):303-307.
- 621 51. Fenwick MA, Mansour YT, Franks S, Hardy K. Identification and regulation of bone  
622 morphogenetic protein antagonists associated with preantral follicle development in the  
623 ovary. *Endocrinology*. 2011:in press.
- 624 52. Cimino I, Casoni F, Liu X, Messina A, Parkash J, Jamin SP, Catteau-Jonard S, Collier F,  
625 Baroncini M, Dewailly D, Pigny P, Prescott M, Campbell R, Herbison AE, Prevot V,



- 626           Giacobini P. Novel role for anti-Mullerian hormone in the regulation of GnRH neuron  
627           excitability and hormone secretion. *Nat Commun.* 2016;7:10055.
- 628   53.    Gilbert SB, Roof AK, Rajendra Kumar T. Mouse models for the analysis of gonadotropin  
629           secretion and action. *Best Pract Res Clin Endocrinol Metab.* 2018;32(3):219-239.
- 630   54.    Couse JF, Korach KS. Estrogen receptor null mice: what have we learned and where will  
631           they lead us? *Endocr Rev.* 1999;20(3):358-417.
- 632   55.    Welt CK, Pagan YL, Smith PC, Rado KB, Hall JE. Control of follicle-stimulating  
633           hormone by estradiol and the inhibins: critical role of estradiol at the hypothalamus  
634           during the luteal-follicular transition. *J Clin Endocrinol Metab.* 2003;88(4):1766-1771.
- 635   56.    Woodruff T, Krummen L, McCray G, Mather J. *In situ* ligand binding of recombinant  
636           human [<sup>125</sup>I] activin-A and recombinant human [<sup>125</sup>I] inhibin-A to the adult rat ovary.  
637           *Endocrinology.* 1993;133(6):2998-3006.
- 638   57.    Woodruff TK, Besecke LM, Groome N, Draper LB, Schwartz NB, Weiss J. Inhibin A  
639           and inhibin B are inversely correlated to follicle-stimulating hormone, yet are discordant  
640           during the follicular phase of the rat estrous cycle, and inhibin A is expressed in a  
641           sexually dimorphic manner. *Endocrinology.* 1996;137(12):5463-5467.
- 642   58.    Visser JA, de Jong FH, Laven JS, Themmen AP. Anti-Mullerian hormone: a new marker  
643           for ovarian function. *Reproduction.* 2006;131(1):1-9.
- 644   59.    Weenen C, Laven JS, Von Bergh AR, Cranfield M, Groome NP, Visser JA, Kramer P,  
645           Fauser BC, Themmen AP. Anti-Mullerian hormone expression pattern in the human  
646           ovary: potential implications for initial and cyclic follicle recruitment. *Mol Hum Reprod.*  
647           2004;10(2):77-83.

- 648 60. Convissar S, Armouti M, Fierro MA, Winston NJ, Scoccia H, Zamah AM, Stocco C.  
649 Regulation of AMH by oocyte-specific growth factors in human primary cumulus cells.  
650 *Reproduction*. 2017;154(6):745-753.
- 651 61. Dewailly D, Andersen CY, Balen A, Broekmans F, Dilaver N, Fanchin R, Griesinger G,  
652 Kelsey TW, La Marca A, Lambalk C, Mason H, Nelson SM, Visser JA, Wallace WH,  
653 Anderson RA. The physiology and clinical utility of anti-Mullerian hormone in women.  
654 *Hum Reprod Update*. 2014;20(3):370-385.
- 655 62. Briley SM, Jasti S, McCracken JM, Hornick JE, Fegley B, Pritchard MT, Duncan FE.  
656 Reproductive age-associated fibrosis in the stroma of the mammalian ovary.  
657 *Reproduction*. 2016;152(3):245-260.
- 658 63. Grgurevic L, Christensen GL, Schulz TJ, Vukicevic S. Bone morphogenetic proteins in  
659 inflammation, glucose homeostasis and adipose tissue energy metabolism. *Cytokine*  
660 *Growth Factor Rev*. 2016;27:105-118.
- 661 64. Vukicevic S, Grgurevic L. Bone morphogenetic proteins in inflammation. In: Parnham  
662 M, ed. *Encyclopedia of Inflammatory Disease*. Basel: Springer Verlag; 2015:1-15.
- 663 65. Lakhal B, Laissue P, Braham R, Elghezal H, Saad A, Fellous M, Veitia RA. A novel  
664 BMP15 variant, potentially affecting the signal peptide, in a familial case of premature  
665 ovarian failure. *Clin Endocrinol (Oxf)*. 2009;71(5):752-753.
- 666 66. Kumar R, Alwani M, Kosta S, Kaur R, Agarwal S. BMP15 and GDF9 Gene Mutations in  
667 Premature Ovarian Failure. *J Reprod Infertil*. 2017;18(1):185-189.
- 668 67. Fonseca DJ, Ortega-Recalde O, Esteban-Perez C, Moreno-Ortiz H, Patino LC, Bermudez  
669 OM, Ortiz AM, Restrepo CM, Lucena E, Laissue P. BMP15 c.-9C>G promoter sequence

- 670 variant may contribute to the cause of non-syndromic premature ovarian failure. *Reprod*  
671 *Biomed Online*. 2014;29(5):627-633.
- 672 68. Beau I, Renault L, Clemence D, Patino L, Delemer B, Laissue P, Young J, Binart N.  
673 Bone morphogenetic protein receptor variants: A new cause of primary ovarian  
674 insufficiency. *Journal of the Endocrine Society*. 2019;3.
- 675 69. Faure MO, Nicol L, Fabre S, Fontaine J, Mohoric N, McNeilly A, Taragnat C. BMP-4  
676 inhibits follicle-stimulating hormone secretion in ewe pituitary. *J Endocrinol*.  
677 2005;186(1):109-121.
- 678 70. Bazina M, Vukojevic K, Roje D, Saraga-Babic M. Influence of growth and  
679 transcriptional factors, and signaling molecules on early human pituitary development. *J*  
680 *Mol Histol*. 2009;40(4):277-286.
- 681 71. Sallon C, Faure MO, Fontaine J, Taragnat C. Dynamic regulation of pituitary mRNAs for  
682 bone morphogenetic protein (BMP) 4, BMP receptors, and activin/inhibin subunits in the  
683 ewe during the estrous cycle and in cultured pituitary cells. *J Endocrinol*.  
684 2010;207(1):55-65.
- 685 72. Cameron V, Nishimura E, Mathews L, Lewis K, Sawchenko P, Vale W. Hybridization  
686 histochemical localization of activin receptor subtypes in rat brain, pituitary, ovary, and  
687 testis. *Endocrinology*. 1994;134(2):799-808.
- 688 73. Renault L, Patino LC, Magnin F, Delemer B, Young J, Laissue P, Binart N, Beau I.  
689 BMPR1A and BMPR1B Missense Mutations Cause Primary Ovarian Insufficiency. *J*  
690 *Clin Endocrinol Metab*. 2020;105(4).
- 691 74. Gurbuz F, Desai S, Diao F, Turkkahraman D, Wranitz F, Wood-Trageser M, Shin YH,  
692 Kotan LD, Jiang H, Witchel S, Gurtunca N, Yatsenko S, Mysliwec D, Topaloglu K,

693 Rajkovic A. Novel inactivating mutations of the DCAF17 gene in American and Turkish  
694 families cause male infertility and female subfertility in the mouse model. *Clin Genet.*  
695 2018;93(4):853-859.

696

697

698 **Figures legends**

699

700 **Fig. 1. Generation and validation of a *Grem2* null allele.** (A) Schematic of the *Grem2* locus  
701 on chromosome 1. *Grem2* contains two exons, with the open reading frame (ORF) encoded in  
702 exon 2. The 5' and 3' guide sequences are shown with the protospacer adjacent motif (PAM)  
703 site in red. The 5' guide sequence is located in intron 1 and the 3' guide sequence is located  
704 within the 3' untranslated region (UTR). (B) PCR genotyping of genomic DNA of potential  
705 founder mice, labeled P1-P4. Different size deletions are typical due to the imprecise nature of  
706 NHEJ. (C) Summary of DNA sequencing information and alignment of the founders P2 and P3  
707 with the location of the ORF shown in green and the 3' UTR in red. (D) Validation of loss of  
708 *Grem2* transcript in *Grem2*<sup>-/-</sup> tissues by qPCR, n=3 independent ovaries for wild type (WT) and  
709 n=4 for knockout (KO), \*\*P<0.01. Levels are normalized to *Gapd* and shown relative to the  
710 amount in the wild type ovary. (E) Comparison of incisors between wild type and *Grem2*<sup>-/-</sup> from  
711 the P2 parental line, which was chosen from 2 founder lines with similar fertility defects. Graph  
712 shows data for upper and lower incisors in wild type and *Grem2*<sup>-/-</sup> at three ages. No difference  
713 was found in upper or lower incisor length between wild type and *Grem2*<sup>-/-</sup> at 3 weeks of age  
714 (n=6 mice each genotype). Lower and upper incisors of *Grem2*<sup>-/-</sup> (n=5 mice) were significantly  
715 smaller at 6 weeks of age (\*P<0.05) but only upper incisors were significantly smaller  
716 (\*\*P<0.01) in *Grem2*<sup>-/-</sup> (n=5) compared to wild type (n=5) at 12 weeks of age. Image insert,  
717 wild type and *Grem2*<sup>-/-</sup> incisors at 9 months of age. Scale bar in photograph, 4mm.

718

719 **Fig. 2. *Grem2*<sup>-/-</sup> females are subfertile.** (A) Body weight (g) at time of necropsy for wild type  
720 (black squares) and *Grem2*<sup>-/-</sup> (grey circles) females at 3, 6, 12, and 24 weeks of age. Markers

721 represent the mean +/- s.e.m. of n=3-16 animals of each genotype, \*\*P<0.01 by Student's *t*-test  
722 between wild type and knockout mice at the indicated time point. (B) Average litter sizes (pups  
723 per litter) wild type (n=4) and *Grem2*<sup>-/-</sup> (n=5) mice. Females of each genotype were set up in  
724 breeding pairs at sexual maturity (6-8 weeks of age) to a wild type male and the number of pups  
725 recorded over eight months. The average pups per litter is shown as mean +/- s.e.m for the entire  
726 breeding trial ("overall"; months 1-8) or in two age brackets (1-4 months versus 5-8 months).  
727 The data were split into two age brackets to determine if there was any effect of age, with the  
728 asterisk indicated statistical significance in the 5-8-month group; \*P<0.05 by Student's *t*-test.  
729 (C) Average litters per month between wild type and *Grem2*<sup>-/-</sup> ("KO") females in the same 8-  
730 month breeding trial as shown in panel B. Data are shown as mean +/- s.e.m, with \*\*indicating  
731 P<0.01 by Student's *t*-test.

732

733 **Fig. 3. *Grem2*<sup>-/-</sup> ovaries show normal follicle morphometrics prior to sexual maturity.** (A)

734 (A) Morphometric assessment of follicle numbers in sexually immature mice. Shown are mean  
735 +/- s.e.m. of follicle counts obtained from n=3 of each genotype at 3-weeks of age. B) Atretic  
736 follicle counts for the same ovaries as in panel A but at a different scale due to the low overall  
737 amounts of follicle atresia in immature mice. \*\*P<0.01 indicates a significantly reduced number  
738 of atretic follicles in *Grem2*<sup>-/-</sup> by Student's *t*-test. (C) Representative PAS histology for a 3-week  
739 wild type ovary showing primordial follicles (PrF), primary follicles (PF), secondary follicles  
740 (SF) and antral follicles (AF). The oviduct (OVI) is also indicated. (D) Representative PAS  
741 histology for a 3-week old *Grem2*<sup>-/-</sup> with similar follicle stages as the wild type. Scale bar in C, D  
742 100  $\mu$ m.

743

744 **Fig. 4. Sexually mature *Grem2*<sup>-/-</sup> ovaries show continuing folliculogenesis but evidence of**  
745 **macrophage infiltration at six months of age.** (A, B) Representative PAS histology of a wild  
746 type ovary at 6-months of age showing folliculogenesis and oocyte remnants (ZPR) within the  
747 interior of the ovary, which is typical in this strain of mice. Area boxed in (A) is shown at a  
748 higher magnification in panel B. (B) Boxed area in panel (A) showing primordial follicles (PrF),  
749 primary follicles (PF), secondary follicles (SF), ZPR, and an atretic follicle (Atr) are shown at  
750 higher magnification for the representative wild type ovary. (C) Representative PAS histologic  
751 section of an ovary from a 6-month old *Grem2*<sup>-/-</sup> mouse. All follicle stages are present as are  
752 corpora lutea (CL), indicating ovulation. Boxed areas in panel C is shown as higher  
753 magnification images in panel D. Arrowheads in panel C, D indicate large patches of PAS+ cells  
754 that are distinct from PAS+ ZPRs (Panel E). (E) Anti-F4/80 immunohistochemistry in a  
755 representative wild type ovary showing the typical pattern of single positive cells (arrowheads)  
756 scattered within the stroma, theca, and CL. (F) Representative *Grem2*<sup>-/-</sup> ovary at the same  
757 magnification as panel (E) showing regions of F4/80 positive immunoreactivity (arrowheads) in  
758 areas that are larger and less dispersed as well as an F4/80 negative ZPR. Scale bar in panels A,  
759 C, 200  $\mu$ m; panel B, D,E, F, scale bar 50 $\mu$ m.

760

761 **Fig. 5. *Grem2*<sup>-/-</sup> mice have irregular estrous cycles.** (A) Three typical estrous cycles for each  
762 genotype are shown for 6-month old wild type (WT) (black) and *Grem2*<sup>-/-</sup> (red) mice from a total  
763 of n=6 mice per genotype. Estrous cycle day is indicated on the y-axis as estrus (E), proestrus  
764 (P), diestrus (D), and metestrus (M) for both genotypes (B) Percentage of time in metestrus and  
765 diestrus, and (C) number of days in estrus for 6-month old wild type (n=6) and *Grem2*<sup>-/-</sup> (n=6)  
766 for a one-month period. \*P<0.05.

767

768 **Fig. 6. Lack of correlation between serum estradiol and FSH in diestrous stage *Grem2*<sup>-/-</sup>**

769 **mice.** (A) Linear regression of serum estradiol (pg/mL) and FSH (ng/mL) in WT (shown as  
770 black circles) (n=5) and *Grem2*<sup>-/-</sup> (shown as red squares) (n=6) at six months of age. (B) Relative  
771 mRNA expression levels by qPCR for *Grem2* in the wild type mouse ovary, hypothalamus, and  
772 pituitary normalized to *Gapd* and relative to the level of *Grem2* in the ovary (n=5 animals). (C)  
773 mRNA expression of inhibin/activin subunits, *Inha*, *Inhba*, *Inhbb*, by qPCR in ovaries from  
774 diestrus stage 6-month-old mice (n=6 each genotype). \*P<0.05 by Student's *t*-test.

775

776 **Fig. 7. Follicles from *Grem2*<sup>-/-</sup> mice produce reduced levels of AMH.** Ovary sections from 6-

777 month-old WT and *Grem2*<sup>-/-</sup> mice were analyzed for AMH immunoreactivity (red) and DAPI  
778 (blue) was used to stain nuclei (A). Arrowheads indicate secondary follicles (SF). Scale bars,  
779 100 μm (n=3 per genotype). Data were analyzed by classifying follicles as preantral follicle type  
780 (B) or by individual types (C, D, and E). Grouping all preantral follicles showed lower levels of  
781 expression in the *Grem2*<sup>-/-</sup> mice (B), as did type 4 follicles (D).

782

783 **Fig. 8. Model of the GREM2 variant S119F with the ligand GDF5.** (A) Structure of GREM2

784 (monomers in pale orange and tan) in complex with GDF5 (monomers in slate and pale green)  
785 with S119 shown in red, PDB ID: 5HK5 (6) (B) Structure of GREM2-GDF5 with S119 mutated  
786 to F119, with the most probable rotomer shown in red. Zoomed in view of panel A, focusing on  
787 the S119 residue and its local interactions. (D) Zoomed in view of panel B, focusing the F119  
788 residue and its local interactions.

789



790 **Tables**

791 **Table 1.** Summary of gene expression by qPCR of six-month-old wild type (n=6) and *Grem2*<sup>-/-</sup>  
 792 (n=6) ovaries at diestrus. Data were analyzed by the  $\Delta\Delta$ CT method using *Gapd* for normalization  
 793 and data are shown relative to the wild type mean. Fold change is levels of *Grem2*<sup>-/-</sup> compared to  
 794 WT. Data were analyzed using the nonparametric Mann-Whitney *U* test. <sup>a</sup>Statistical significance  
 795 between wild type and *Grem2*<sup>-/-</sup> ovaries (P<0.05). ND, no difference.

| Symbol         | Gene                                  | WT<br>Ave. +/-<br>s.e.m. | <i>Grem2</i> <sup>-/-</sup><br>Ave. +/- s.e.m. | Fold<br>Change |
|----------------|---------------------------------------|--------------------------|------------------------------------------------|----------------|
| <i>Bmp2</i>    | Bone morphogenetic protein-2          | 1.0 +/- 0.2              | 1.0 +/- 0.1                                    | ND             |
| <i>Bmp4</i>    | Bone morphogenetic protein-4          | 1.0 +/- 0.3              | 0.7 +/- 0.1                                    | ND             |
| <i>Bmp15</i>   | Bone morphogenetic protein-15         | 1.0 +/- 0.2              | 1.2 +/- 0.1                                    | ND             |
| <i>Cyp19a1</i> | Aromatase                             | 1.0 +/- 0.3              | 0.8 +/- 0.1                                    | ND             |
| <i>Fshr</i>    | Follicle stimulating hormone receptor | 1.0 +/- 0.3              | 1.0 +/- 0.0                                    | ND             |
| <i>Gdf9</i>    | Growth and differentiation factor-9   | 1.0 +/- 0.1              | 1.1 +/- 0.1                                    | ND             |
| <i>Kitl1</i>   | Kit ligand 1                          | 1.0 +/- 0.1              | 0.8 +/- 0.1                                    | ND             |
| <i>Kitl2</i>   | Kit ligand 2                          | 1.1 +/- 0.1              | 0.9 +/- 0.2                                    | ND             |
| <i>Sele</i>    | Selectin E                            | 1.0 +/- 0.2              | 1.0 +/- 0.1                                    | ND             |
| <i>Tnfa</i>    | Tumor necrosis factor $\alpha$        | 1.0 +/- 0.2              | 0.9 +/- 0.1                                    | ND             |

796

797

798

799 **Table 2. Serum hormone data for six-month old female wild type and *Grem2*<sup>-/-</sup> mice at**  
800 **diestrus.** Results are shown as the mean +/- s.e.m. for the indicated number of females (n). Data  
801 were log transformed prior to statistical analysis using the nonparametric Mann-Whitney *U* test.  
802 Statistical significance was only detected for AMH values, \*\*P<0.01

| <b>Hormone</b>                 | <b>Wild type (n)</b> | <b><i>Grem2</i><sup>-/-</sup> (n)</b> |
|--------------------------------|----------------------|---------------------------------------|
| FSH (ng/mL)                    | 7.8 +/- 2.5 (5)      | 6.2 +/- 1.7 (6)                       |
| LH (ng/mL)                     | 0.4 +/- 0.1 (5)      | 1.1 +/- 0.8 (6)                       |
| Estradiol (pg/mL)              | 8.7 +/- 4.8 (5)      | 4.5 +/- 1.1 (6)                       |
| Testosterone (ng/dL)           | 45.5 +/- 29.8 (5)    | 31.0 +/- 5.6 (6)                      |
| Anti-Müllerian Hormone (ng/mL) | 146.8 +/- 13.8 (5)   | 66.1 +/- 10.5** (6)                   |

803

Figure 1

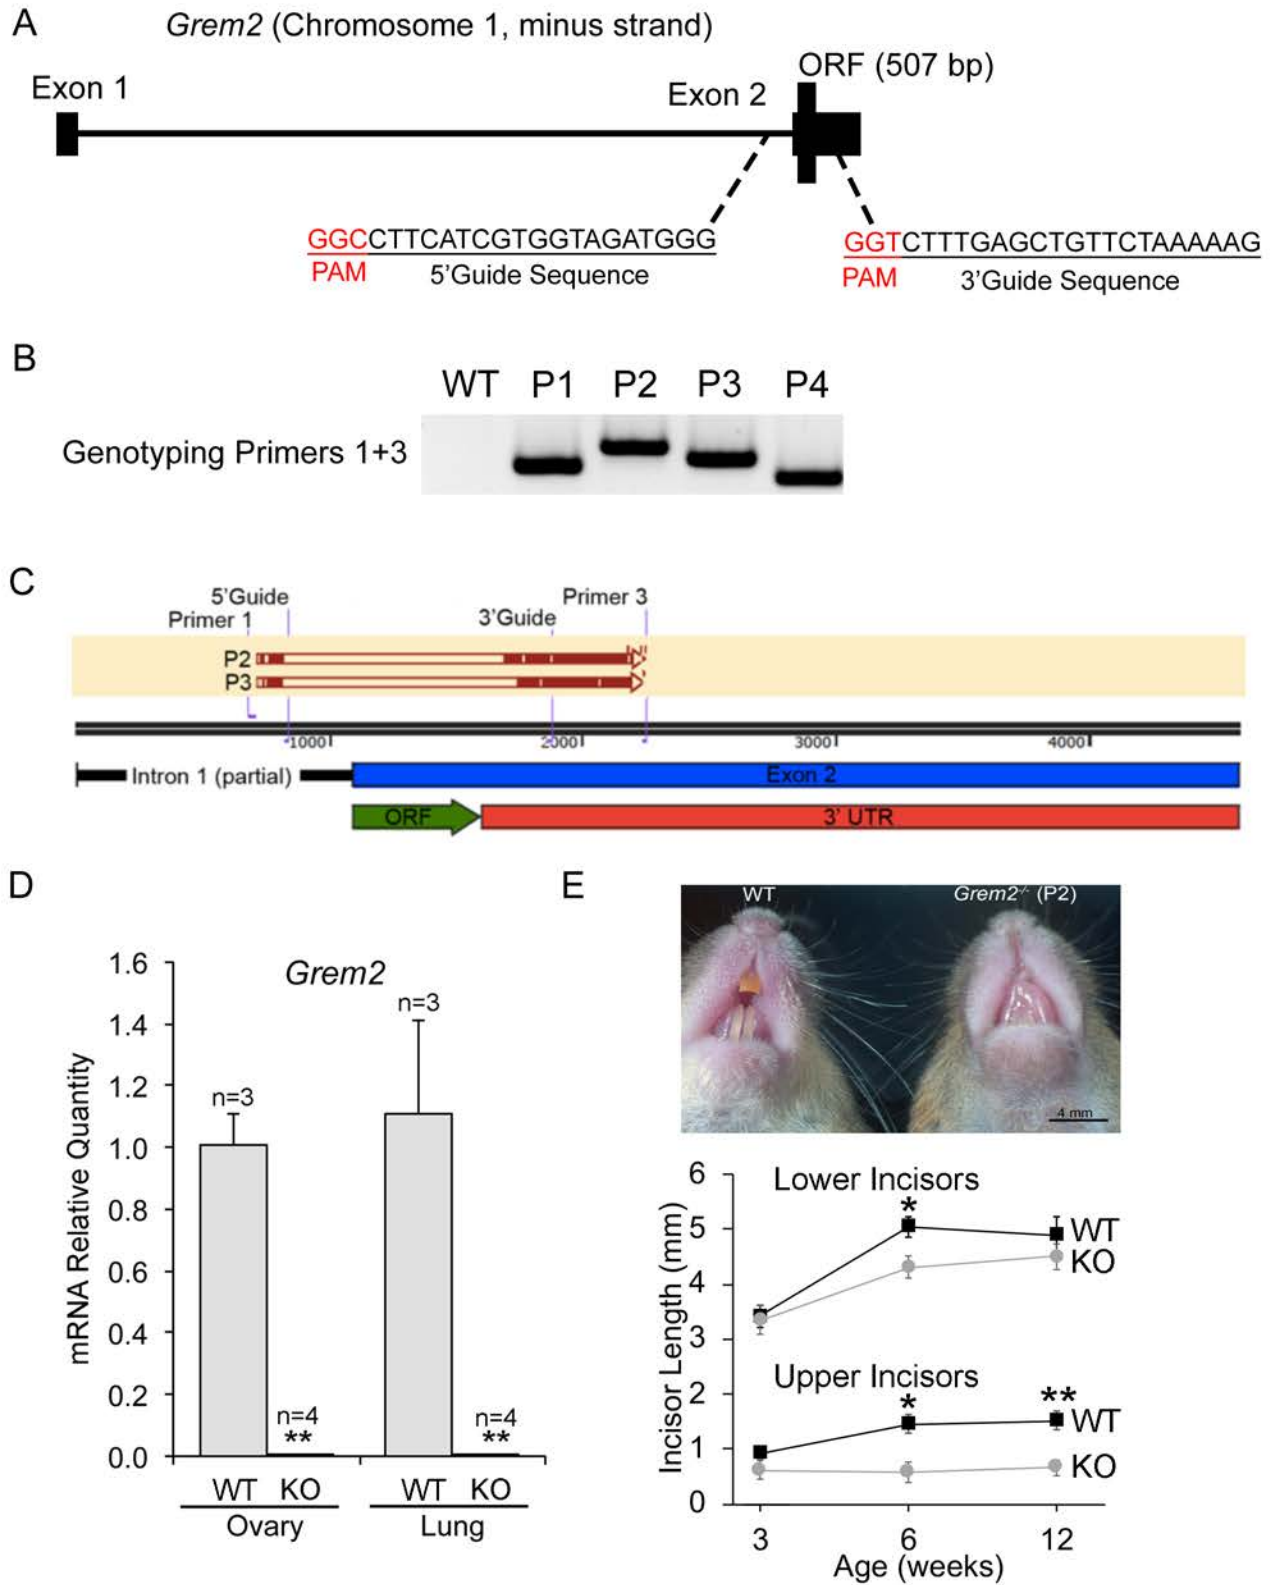

Figure 2

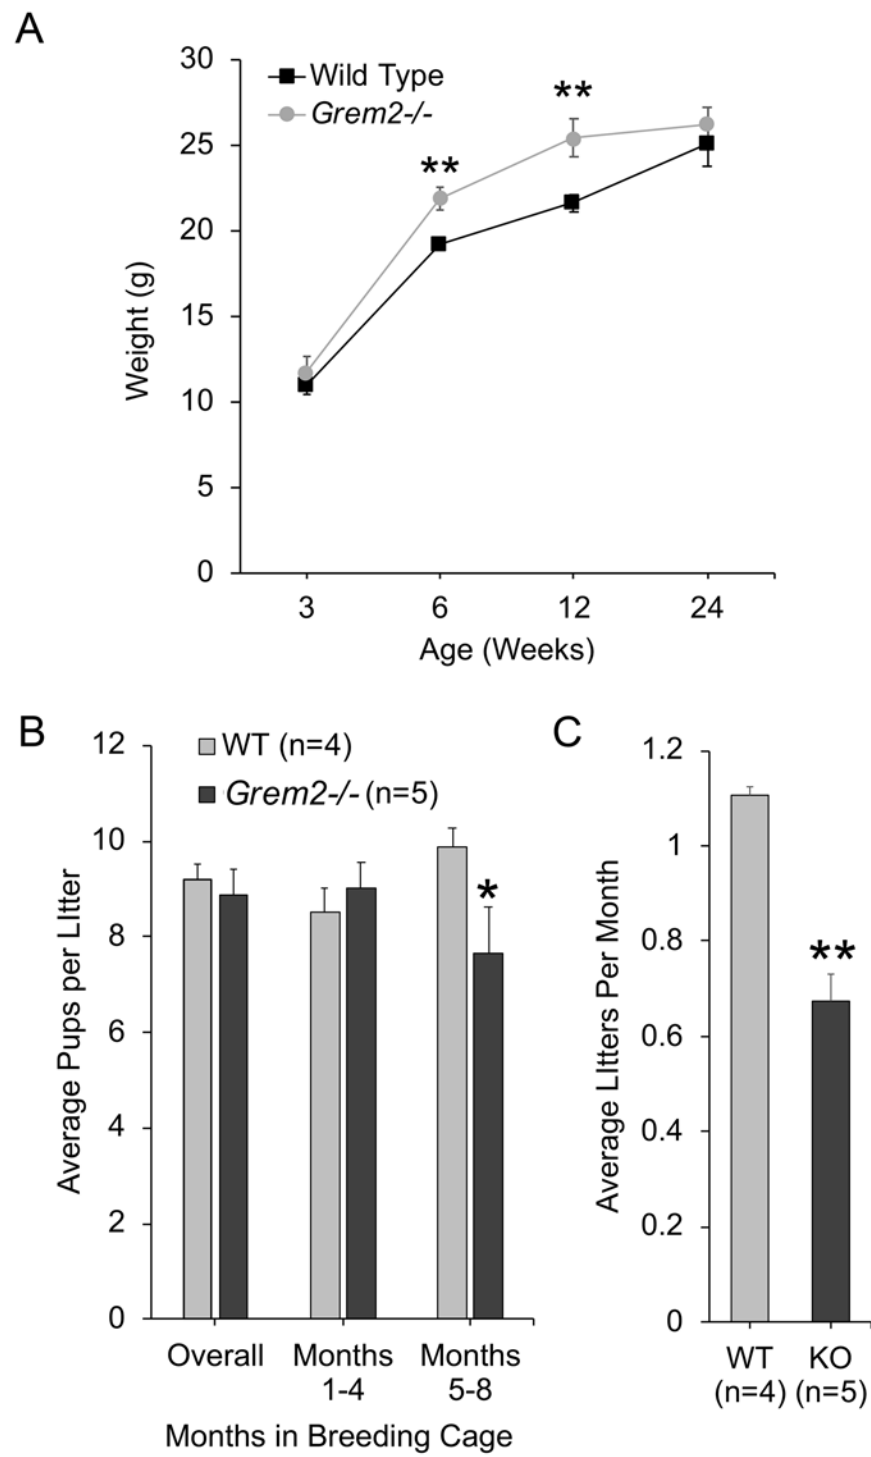

Figure 3

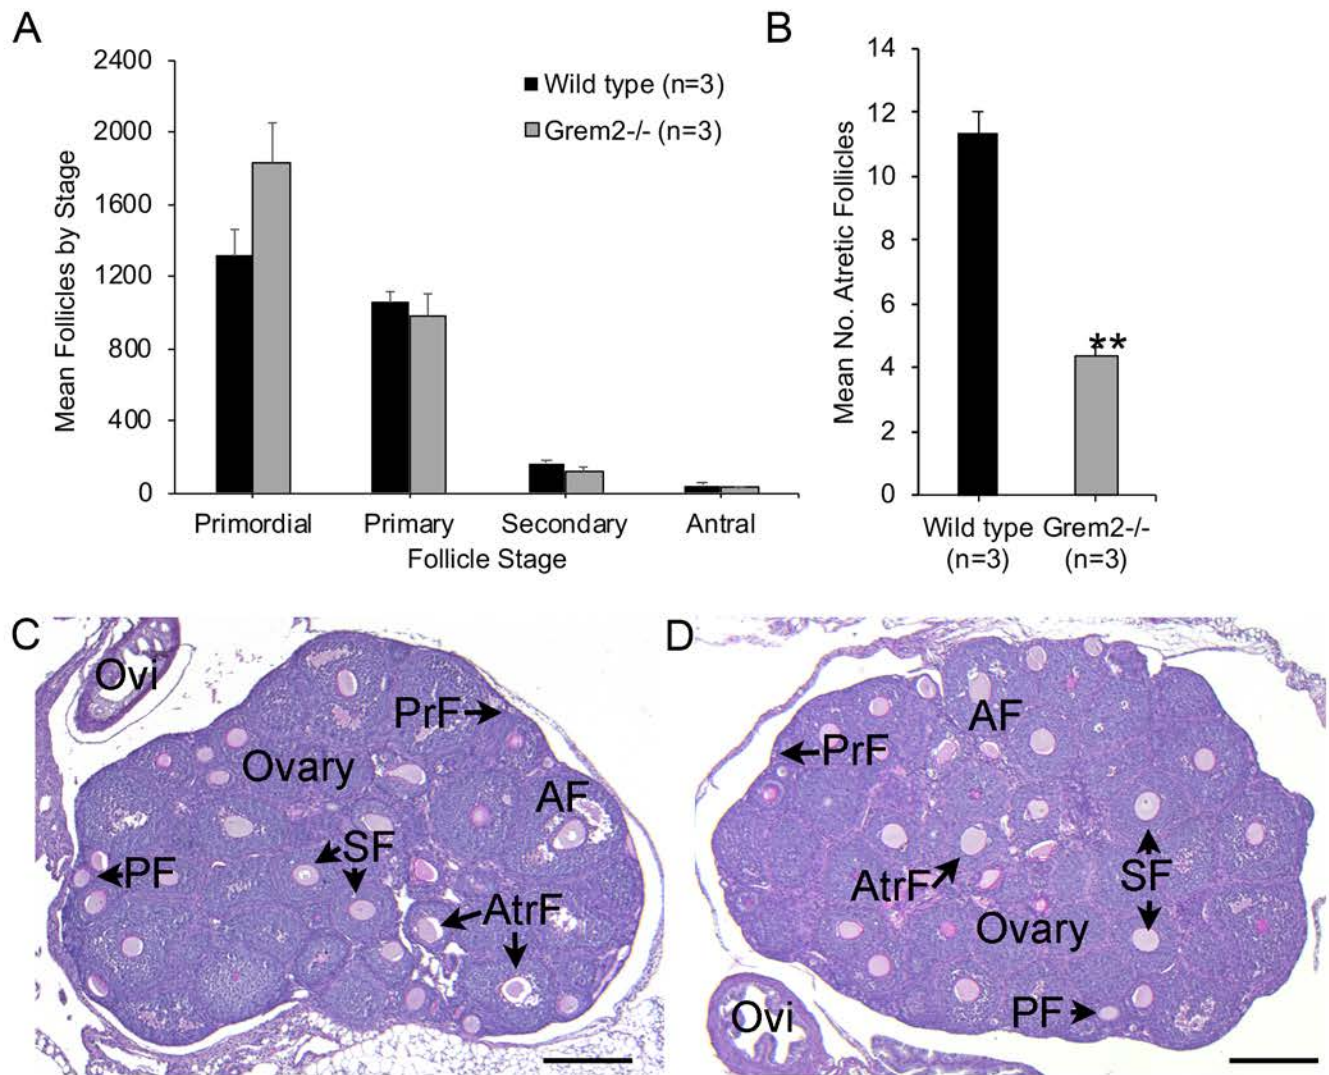

Figure 4

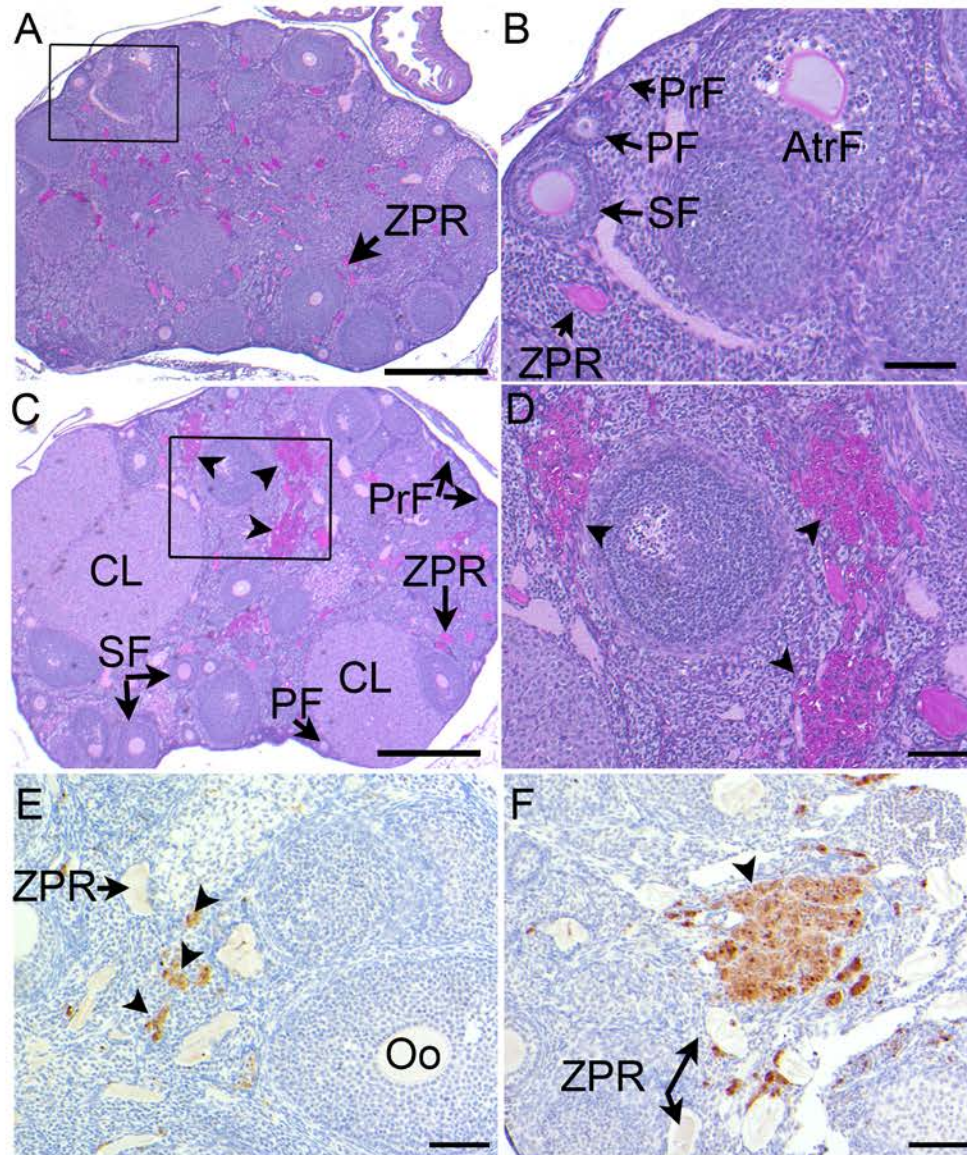

Figure 5

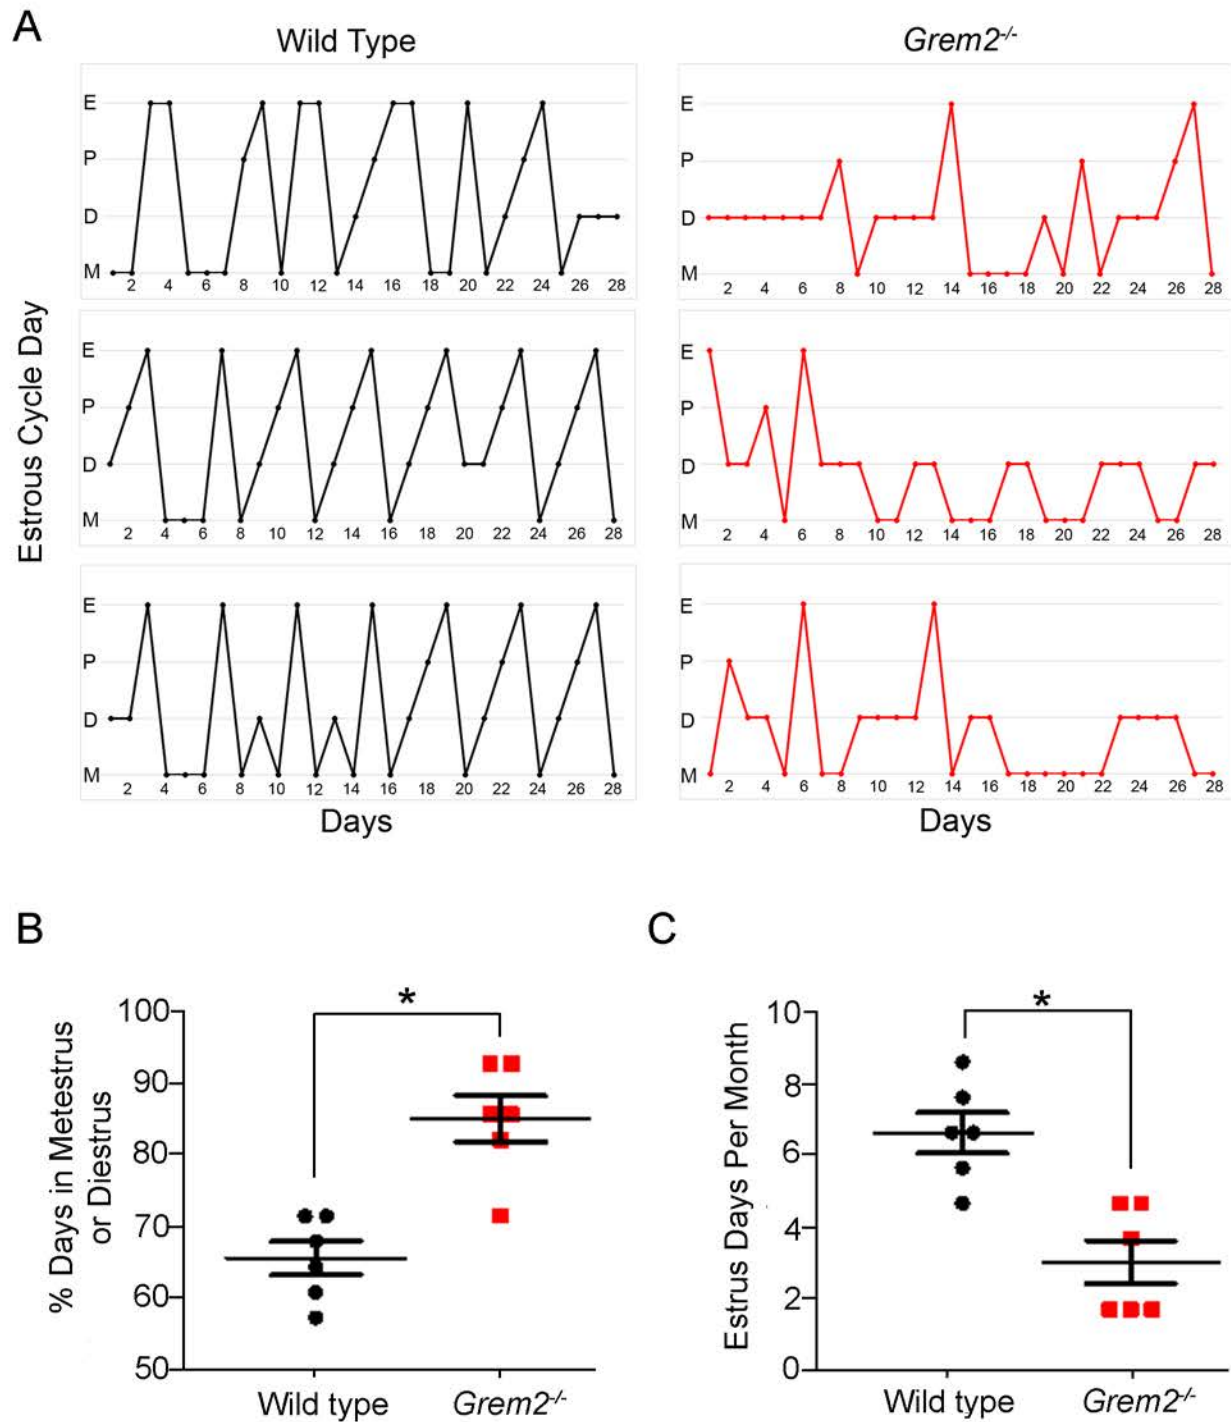

Figure 6

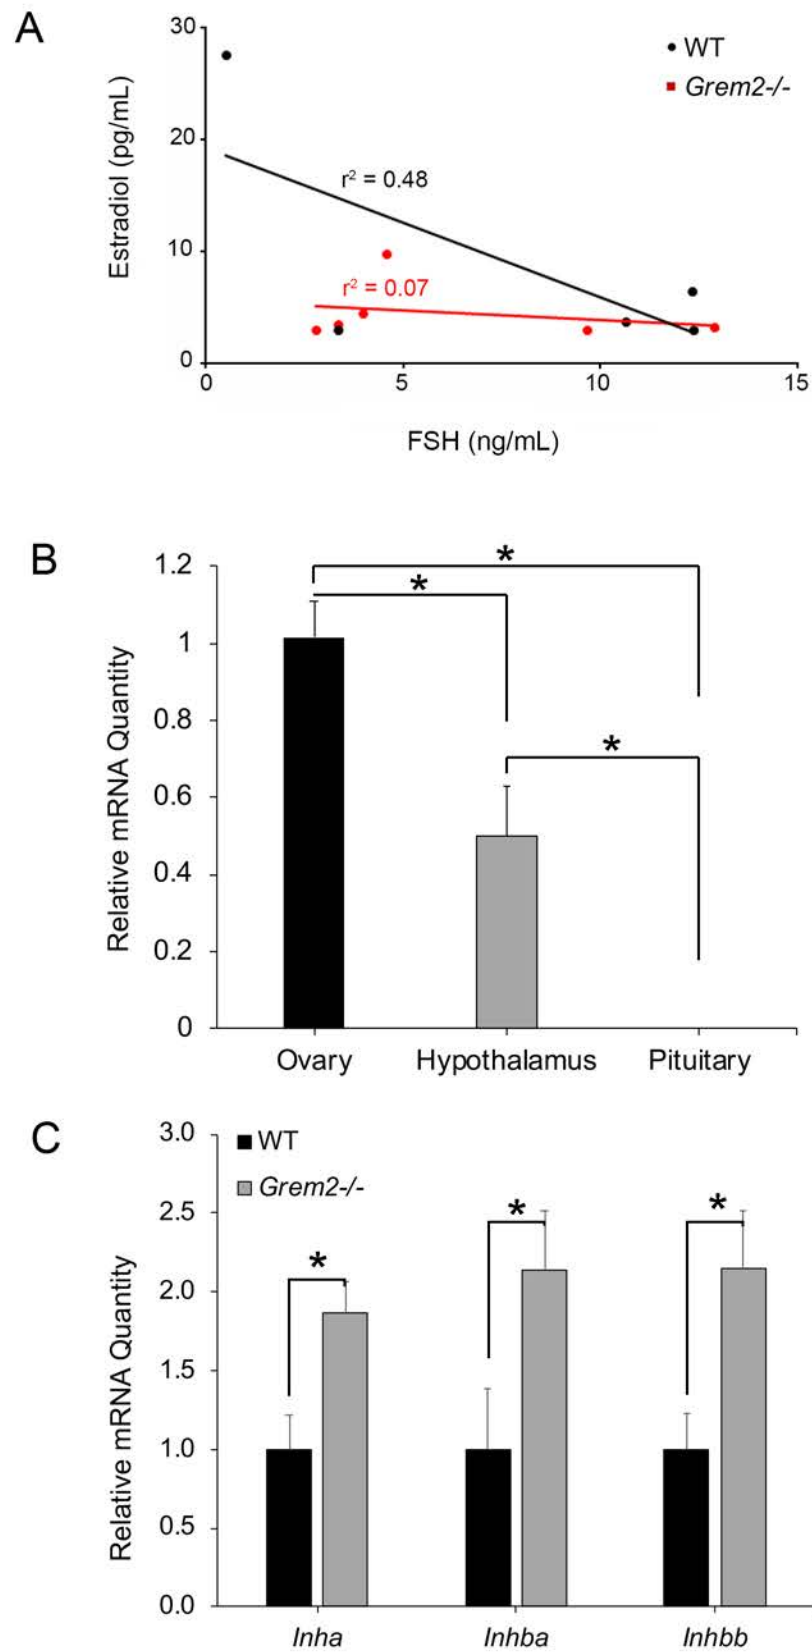



Figure 7

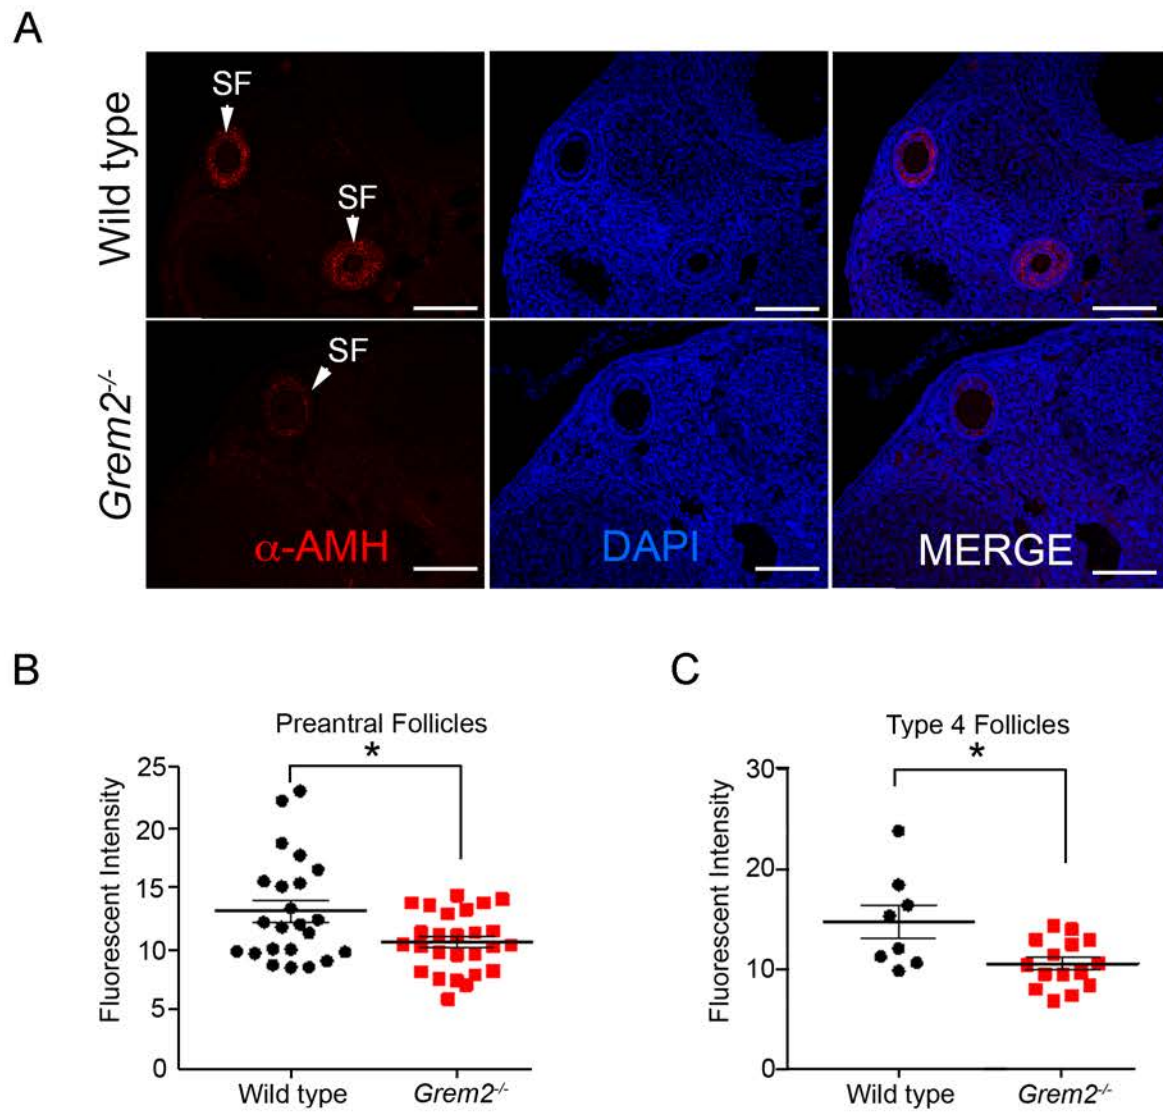

Figure 8

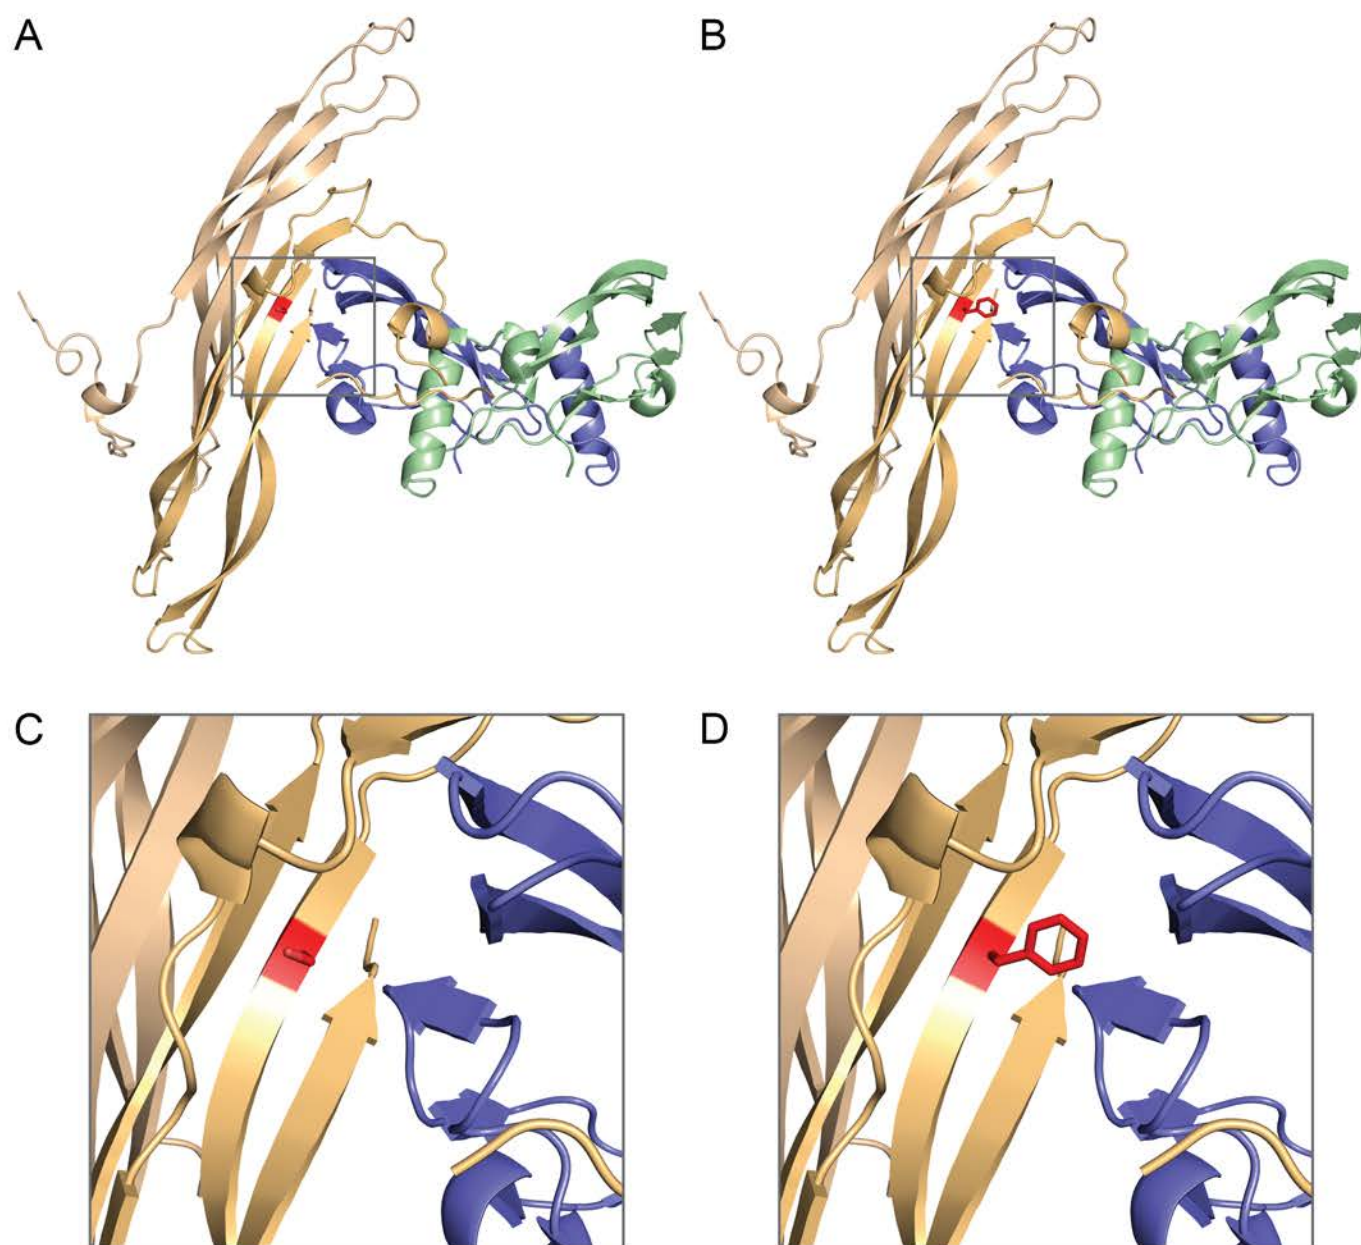

Source: https://www.biorxiv.org/content/10.1101/2020.10.01.322818v1.full.pdf
